# Supplementary material
Source: Research Square preprint supplement (doi:10.21203/rs.3.rs-8789039/v1)
Supplement: Supplementary file 1 [file 849405858fb073f7fdf0d47b.docx]

This study did not involve any gel or blot experiments; therefore, uncropped gel or blot images are *not applicable*.
