# Supplementary material
Source: Research Square preprint supplement (doi:10.21203/rs.3.rs-8789039/v1)
Supplement: Supplementary file 2 [file e6e19999f8bc74626c30f6b6.pdf]

**Table S1.** Top 54 genes from DESeq2 differential expression analysis (high vs low TB)

| No. | Gene                  | BaseMean | LogFC   | LfcSE  | Stat    | P value  | Adj. P val |
|-----|-----------------------|----------|---------|--------|---------|----------|------------|
| 1   | <i>TFF3_7048</i>      | 100.2766 | 22.7309 | 3.9052 | 5.8207  | 5.86E-09 | 8.52E-05   |
| 2   | <i>LNXI_18397</i>     | 169.9208 | 10.8022 | 2.0284 | 5.3255  | 1.01E-07 | 0.0007     |
| 3   | <i>ZFP42_89799</i>    | 35.4992  | 21.2967 | 4.0543 | 5.2528  | 1.50E-07 | 0.0007     |
| 4   | <i>PCDHB3_25298</i>   | 527.0177 | 6.1554  | 1.2160 | 5.0621  | 4.15E-07 | 0.0010     |
| 5   | <i>XAGE2_87736</i>    | 40.7714  | 21.4984 | 4.2514 | 5.0567  | 4.26E-07 | 0.0010     |
| 6   | <i>SLCO1A2_26370</i>  | 126.7118 | -7.4639 | 1.4845 | -5.0278 | 4.96E-07 | 0.0010     |
| 7   | <i>ABCC12_87981</i>   | 37.2130  | 21.3627 | 4.2515 | 5.0247  | 5.04E-07 | 0.0010     |
| 8   | <i>ITIH6_89568</i>    | 58.8126  | 20.5589 | 4.2215 | 4.8701  | 1.12E-06 | 0.0020     |
| 9   | <i>GARNL3_27252</i>   | 29.4009  | 8.2978  | 1.7722 | 4.6822  | 2.84E-06 | 0.0043     |
| 10  | <i>DNAJC22_16620</i>  | 510.5320 | 7.5441  | 1.6137 | 4.6750  | 2.94E-06 | 0.0043     |
| 11  | <i>CYP4F8_24089</i>   | 11.6840  | 19.7575 | 4.2531 | 4.6454  | 3.39E-06 | 0.0045     |
| 12  | <i>PRICKLE2_19595</i> | 279.7679 | 4.5500  | 0.9861 | 4.6141  | 3.95E-06 | 0.0048     |
| 13  | <i>DLX5_18350</i>     | 26.3851  | 19.3679 | 4.2518 | 4.5552  | 5.23E-06 | 0.0059     |
| 14  | <i>TBX1_16353</i>     | 116.8381 | 7.7451  | 1.7185 | 4.5068  | 6.58E-06 | 0.0068     |
| 15  | <i>ZNF235_10960</i>   | 183.4985 | 9.4889  | 2.1114 | 4.4941  | 6.99E-06 | 0.0068     |
| 16  | <i>SNPH_17872</i>     | 367.9773 | 7.2030  | 1.6376 | 4.3985  | 1.09E-05 | 0.0099     |
| 17  | <i>ADRA2C_22752</i>   | 63.3501  | 9.3604  | 2.1451 | 4.3635  | 1.28E-05 | 0.0109     |
| 18  | <i>NGFR_17440</i>     | 75.3601  | 8.1333  | 1.8735 | 4.3412  | 1.42E-05 | 0.0114     |
| 19  | <i>LRIT3_21714</i>    | 69.7873  | 8.0793  | 1.8664 | 4.3289  | 1.50E-05 | 0.0115     |
| 20  | <i>TBX15_88894</i>    | 37.6973  | 8.6460  | 2.0065 | 4.3090  | 1.64E-05 | 0.0115     |
| 21  | <i>CNPY4_25551</i>    | 32.5042  | 8.4343  | 1.9583 | 4.3070  | 1.65E-05 | 0.0115     |
| 22  | <i>KRT18_92564</i>    | 58.8148  | 9.2841  | 2.1657 | 4.2868  | 1.81E-05 | 0.0116     |
| 23  | <i>ADAMTSL4_24568</i> | 412.1653 | -3.6595 | 0.8558 | -4.2762 | 1.90E-05 | 0.0116     |
| 24  | <i>MMAA_11927</i>     | 37.2466  | 8.6287  | 2.0189 | 4.2739  | 1.92E-05 | 0.0116     |
| 25  | <i>ATP7A_16851</i>    | 448.4429 | 1.8820  | 0.4533 | 4.1521  | 3.29E-05 | 0.0192     |

| No. | Gene                 | BaseMean | LogFC   | LfcSE  | Stat    | P value  | Adj. P val |
|-----|----------------------|----------|---------|--------|---------|----------|------------|
| 26  | <i>EPHX4_10710</i>   | 71.8036  | 8.0959  | 1.9691 | 4.1115  | 3.93E-05 | 0.0214     |
| 27  | <i>SERHL2_28292</i>  | 160.2545 | 7.0156  | 1.7074 | 4.1089  | 3.98E-05 | 0.0214     |
| 28  | <i>CLCA2_28548</i>   | 596.6705 | 10.1744 | 2.4879 | 4.0896  | 4.32E-05 | 0.0224     |
| 29  | <i>ADM5_20591</i>    | 60.2682  | 9.2889  | 2.2768 | 4.0798  | 4.51E-05 | 0.0226     |
| 30  | <i>RNF144A_20926</i> | 25.1246  | 8.0688  | 1.9816 | 4.0718  | 4.66E-05 | 0.0226     |
| 31  | <i>ASIC1_24534</i>   | 30.7543  | 8.3561  | 2.0668 | 4.0429  | 5.28E-05 | 0.0246     |
| 32  | <i>FGF10_22305</i>   | 74.1265  | 8.1139  | 2.0101 | 4.0366  | 5.42E-05 | 0.0246     |
| 33  | <i>ATP5MPL_25583</i> | 23.4178  | 7.9671  | 1.9873 | 4.0091  | 6.09E-05 | 0.0262     |
| 34  | <i>ZBED9_25756</i>   | 93.8835  | 8.4746  | 2.1146 | 4.0076  | 6.13E-05 | 0.0262     |
| 35  | <i>FRMD6_15845</i>   | 581.8674 | 2.1082  | 0.5281 | 3.9918  | 6.56E-05 | 0.0266     |
| 36  | <i>ANTXR1_20910</i>  | 344.9783 | 2.4624  | 0.6170 | 3.9907  | 6.59E-05 | 0.0266     |
| 37  | <i>VWA2_13854</i>    | 46.0271  | 8.9085  | 2.2437 | 3.9705  | 7.17E-05 | 0.0282     |
| 38  | <i>CECR2_18607</i>   | 128.8237 | 7.9660  | 2.0179 | 3.9476  | 7.89E-05 | 0.0288     |
| 39  | <i>TIGD4_24615</i>   | 29.3269  | 8.2845  | 2.1014 | 3.9425  | 8.07E-05 | 0.0288     |
| 40  | <i>SLC46A3_14686</i> | 332.4674 | 2.4519  | 0.6223 | 3.9401  | 8.15E-05 | 0.0288     |
| 41  | <i>ROBO2_18609</i>   | 25.3409  | 8.0708  | 2.0490 | 3.9388  | 8.19E-05 | 0.0288     |
| 42  | <i>CERS1_33991</i>   | 38.2728  | 8.6613  | 2.2010 | 3.9352  | 8.31E-05 | 0.0288     |
| 43  | <i>SOCS2_6660</i>    | 120.7801 | 6.1865  | 1.5767 | 3.9237  | 8.72E-05 | 0.0295     |
| 44  | <i>FAM110C_20024</i> | 126.0239 | 4.8362  | 1.2400 | 3.9000  | 9.62E-05 | 0.0315     |
| 45  | <i>SUSD2_21594</i>   | 49.9458  | 9.0469  | 2.3231 | 3.8942  | 9.85E-05 | 0.0315     |
| 46  | <i>CEACAM6_26148</i> | 189.6564 | 9.4731  | 2.4343 | 3.8914  | 9.97E-05 | 0.0315     |
| 47  | <i>APOD_357</i>      | 317.7515 | 6.0218  | 1.5518 | 3.8804  | 0.0001   | 0.0323     |
| 48  | <i>HOXA7_14600</i>   | 60.1866  | 7.8951  | 2.0438 | 3.8629  | 0.0001   | 0.0339     |
| 49  | <i>PRSS12_15990</i>  | 212.5453 | -6.3604 | 1.6507 | -3.8532 | 0.0001   | 0.0346     |
| 50  | <i>LRRCC1_13038</i>  | 722.5999 | -3.4043 | 0.8943 | -3.8066 | 0.0001   | 0.0410     |
| 51  | <i>PCDHB13_25302</i> | 30.4862  | 8.3417  | 2.2091 | 3.7761  | 0.0002   | 0.0454     |
| 52  | <i>CNTN1_18508</i>   | 52.0418  | 9.1069  | 2.4209 | 3.7618  | 0.0002   | 0.0463     |

| No. | Gene          | BaseMean | LogFC  | LfcSE  | Stat   | P value | Adj. P val |
|-----|---------------|----------|--------|--------|--------|---------|------------|
| 53  | EDIL3_13279   | 186.2908 | 4.0180 | 1.0682 | 3.7615 | 0.0002  | 0.0463     |
| 54  | SLC43A2_12845 | 58.5422  | 5.7444 | 1.5318 | 3.7501 | 0.0002  | 0.0476     |

Genes were selected using Adj. *P* val < 0.05 and |log $FC$ | > 1.5. Gene labels may include platform-specific identifiers.

**Abbreviations:** Adj. *P* value, Benjamini–Hochberg–adjusted *P* value; DE, differential expression; LfcSE, standard error of log $FC$ ; Log $FC$ , log fold change; TB, tumor budding; TNBC, triple-negative breast cancer.

**Table S2.** Top 188 genes ranked by mutual information (MI) with TB class

| No. | Gene                 | MI score | No. | Gene                  | MI score | No. | Gene                  | MI score | No. | Gene                  | MI score |
|-----|----------------------|----------|-----|-----------------------|----------|-----|-----------------------|----------|-----|-----------------------|----------|
| 1   | <i>CKSIB_1362</i>    | 0.4293   | 51  | <i>KCP_88561</i>      | 0.4293   | 101 | <i>ANXA8_17897</i>    | 0.4293   | 151 | <i>KNCN_88978</i>     | 0.4293   |
| 2   | <i>ARPP19_466</i>    | 0.4293   | 52  | <i>ZFP57_89960</i>    | 0.4293   | 102 | <i>GNL3_18049</i>     | 0.4293   | 152 | <i>FOXD2_89074</i>    | 0.4293   |
| 3   | <i>SLC45A3_12258</i> | 0.4293   | 53  | <i>VIM_18185</i>      | 0.4293   | 103 | <i>COX5B_18008</i>    | 0.4293   | 153 | <i>NKX2-5_89148</i>   | 0.4293   |
| 4   | <i>VASH2_12681</i>   | 0.4293   | 54  | <i>NDUFV1_90568</i>   | 0.4293   | 104 | <i>ZNF816_18216</i>   | 0.4293   | 154 | <i>IGHD_89462</i>     | 0.4293   |
| 5   | <i>LRRCCI_13038</i>  | 0.4293   | 55  | <i>TMEM189_27973</i>  | 0.4293   | 105 | <i>SPRY1_18786</i>    | 0.4293   | 155 | <i>REEP3_89598</i>    | 0.4293   |
| 6   | <i>EDIL3_13279</i>   | 0.4293   | 56  | <i>MMP3_4216</i>      | 0.4293   | 106 | <i>TNFSF13B_19280</i> | 0.4293   | 156 | <i>GNB1L_89611</i>    | 0.4293   |
| 7   | <i>HAND2_13573</i>   | 0.4293   | 57  | <i>TBC1D30_28455</i>  | 0.4293   | 107 | <i>CD38_19506</i>     | 0.4293   | 157 | <i>GBP5_89721</i>     | 0.4293   |
| 8   | <i>KIF19_14414</i>   | 0.4293   | 58  | <i>ANGPTL4_28320</i>  | 0.4293   | 108 | <i>PRICKLE2_19595</i> | 0.4293   | 158 | <i>EDN2_89854</i>     | 0.4293   |
| 9   | <i>SLC46A3_14686</i> | 0.4293   | 59  | <i>SIGLEC11_27854</i> | 0.4293   | 109 | <i>STAR_19847</i>     | 0.4293   | 159 | <i>MEDAG_90476</i>    | 0.4293   |
| 10  | <i>ZBTB42_15005</i>  | 0.4293   | 60  | <i>CCDC130_1019</i>   | 0.4293   | 110 | <i>USP30_19866</i>    | 0.4293   | 160 | <i>APOBEC3D_90589</i> | 0.4293   |
| 11  | <i>IRF4_15768</i>    | 0.4293   | 61  | <i>IDO1_3210</i>      | 0.4293   | 111 | <i>FAM110C_20024</i>  | 0.4293   | 161 | <i>PRCP_90646</i>     | 0.4293   |
| 12  | <i>S100A7A_16138</i> | 0.4293   | 62  | <i>MCM3_4072</i>      | 0.4293   | 112 | <i>MGAM_20192</i>     | 0.4293   | 162 | <i>ZNF724_90804</i>   | 0.4293   |
| 13  | <i>NXF1_16209</i>    | 0.4293   | 63  | <i>ITGB5_3450</i>     | 0.4293   | 113 | <i>IGSF8_20178</i>    | 0.4293   | 163 | <i>RBM39_92712</i>    | 0.4293   |
| 14  | <i>TM6SF1_16943</i>  | 0.4293   | 64  | <i>RAB31_5670</i>     | 0.4293   | 114 | <i>DROSHA_20431</i>   | 0.4293   | 164 | <i>DCAF8_91694</i>    | 0.4293   |
| 15  | <i>NGFR_17440</i>    | 0.4293   | 65  | <i>SLC25A4_6406</i>   | 0.4293   | 115 | <i>ORIN2_20569</i>    | 0.4293   | 165 | <i>GPS1_93022</i>     | 0.4293   |
| 16  | <i>TTBK1_17884</i>   | 0.4293   | 66  | <i>SQSTM1_6740</i>    | 0.4293   | 116 | <i>MAFG_20735</i>     | 0.4293   | 166 | <i>CDK16_92460</i>    | 0.4293   |
| 17  | <i>C3orf70_17965</i> | 0.4293   | 67  | <i>USP7_7602</i>      | 0.4293   | 117 | <i>AP5B1_21108</i>    | 0.4293   | 167 | <i>SRCAP_90788</i>    | 0.4293   |
| 18  | <i>SFTPA1_17909</i>  | 0.4293   | 68  | <i>UBAP2L_7462</i>    | 0.4293   | 118 | <i>LILRB1_21244</i>   | 0.4293   | 168 | <i>BTN3A2_26908</i>   | 0.4293   |
| 19  | <i>NOL6_18053</i>    | 0.4293   | 69  | <i>MRFAP1L1_10556</i> | 0.4293   | 119 | <i>SLC5A9_21712</i>   | 0.4293   | 169 | <i>DNM2_91616</i>     | 0.4293   |
| 20  | <i>IFT27_18625</i>   | 0.4293   | 70  | <i>ODAM_10470</i>     | 0.4293   | 120 | <i>DCT_22118</i>      | 0.4293   | 170 | <i>IL15RA_27350</i>   | 0.4293   |
| 21  | <i>HMSD_18693</i>    | 0.4293   | 71  | <i>FBXL5_10590</i>    | 0.4293   | 121 | <i>MFAP3_22545</i>    | 0.4293   | 171 | <i>TRIM13_28005</i>   | 0.4293   |
| 22  | <i>MPP3_18952</i>    | 0.4293   | 72  | <i>PHF23_11187</i>    | 0.4293   | 122 | <i>GDF11_22582</i>    | 0.4293   | 172 | <i>ZNF761_92911</i>   | 0.4293   |
| 23  | <i>CREBRF_19339</i>  | 0.4293   | 73  | <i>PPDPF_11184</i>    | 0.4293   | 123 | <i>TMC6_22569</i>     | 0.4293   | 173 | <i>DGCR6_15534</i>    | 0.4293   |
| 24  | <i>PATJ_20019</i>    | 0.4293   | 74  | <i>CRAT_11181</i>     | 0.4293   | 124 | <i>ZNF74_22843</i>    | 0.4293   | 174 | <i>EDNRA_88670</i>    | 0.4293   |
| 25  | <i>TACRI_20733</i>   | 0.4293   | 75  | <i>RGS10_11311</i>    | 0.4293   | 125 | <i>SGMS2_22813</i>    | 0.4293   | 175 | <i>DLGAP1_27117</i>   | 0.4293   |

| No. | Gene                  | MI score | No. | Gene                   | MI score | No. | Gene                 | MI score | No. | Gene                  | MI score |
|-----|-----------------------|----------|-----|------------------------|----------|-----|----------------------|----------|-----|-----------------------|----------|
| 26  | <i>B4GALT6_20855</i>  | 0.4293   | 76  | <i>ZBTB17_11403</i>    | 0.4293   | 126 | <i>TRMT10A_22971</i> | 0.4293   | 176 | <i>DDTL_23438</i>     | 0.4293   |
| 27  | <i>SACS_22437</i>     | 0.4293   | 77  | <i>PROCA1_11481</i>    | 0.4293   | 127 | <i>TDRD9_23073</i>   | 0.4293   | 177 | <i>ERO1B_15346</i>    | 0.4293   |
| 28  | <i>ASGR2_22847</i>    | 0.4293   | 78  | <i>GPC4_11583</i>      | 0.4293   | 128 | <i>RNF213_23156</i>  | 0.4293   | 178 | <i>LSMEM1_27464</i>   | 0.4293   |
| 29  | <i>ZCCHC4_23037</i>   | 0.4293   | 79  | <i>ACVR1C_12053</i>    | 0.4293   | 129 | <i>KDM5C_23222</i>   | 0.4293   | 179 | <i>TK2_27960</i>      | 0.4293   |
| 30  | <i>SEC16B_23083</i>   | 0.4293   | 80  | <i>PCNX4_12317</i>     | 0.4293   | 130 | <i>FAM81B_23460</i>  | 0.4293   | 180 | <i>ZNF595_28126</i>   | 0.4293   |
| 31  | <i>ASAP3_23766</i>    | 0.4293   | 81  | <i>UPK3B_12812</i>     | 0.4293   | 131 | <i>TANC2_23794</i>   | 0.4293   | 181 | <i>BCL2A1_17331</i>   | 0.4293   |
| 32  | <i>KIAA1324_24270</i> | 0.4293   | 82  | <i>EPS8L1_12856</i>    | 0.4293   | 132 | <i>GAGE_23922</i>    | 0.4293   | 182 | <i>LRIT3_21714</i>    | 0.4293   |
| 33  | <i>DALRD3_24506</i>   | 0.4293   | 83  | <i>RSF1_13470</i>      | 0.4293   | 133 | <i>ZNF697_24100</i>  | 0.4293   | 183 | <i>USH1C_11650</i>    | 0.4293   |
| 34  | <i>BRSK2_24555</i>    | 0.4293   | 84  | <i>SVBP_14145</i>      | 0.4293   | 134 | <i>SPINK5_24227</i>  | 0.4293   | 184 | <i>ATP6V0A1_11775</i> | 0.4293   |
| 35  | <i>COLEC12_24531</i>  | 0.4293   | 85  | <i>SLC12A2_14584</i>   | 0.4293   | 135 | <i>SUGP1_24642</i>   | 0.4293   | 185 | <i>FUT3_25568</i>     | 0.4293   |
| 36  | <i>FAM83G_24995</i>   | 0.4293   | 86  | <i>IFIH1_14815</i>     | 0.4293   | 136 | <i>DNLZ_25707</i>    | 0.4293   | 186 | <i>CYP11A1_1693</i>   | 0.4293   |
| 37  | <i>CCDC69_24986</i>   | 0.4293   | 87  | <i>ZSCAN21_15202</i>   | 0.4293   | 137 | <i>DSC3_25779</i>    | 0.4293   | 187 | <i>FOXG1_2475</i>     | 0.4293   |
| 38  | <i>PARS2_25040</i>    | 0.4293   | 88  | <i>THSD1_15269</i>     | 0.4293   | 138 | <i>NAV3_26097</i>    | 0.4293   | 188 | <i>RHOXF1_5843</i>    | 0.4293   |
| 39  | <i>USP2_25436</i>     | 0.4293   | 89  | <i>UPRT_15417</i>      | 0.4293   | 139 | <i>TAS2R5_26393</i>  | 0.4293   |     |                       |          |
| 40  | <i>SCARF2_26255</i>   | 0.4293   | 90  | <i>CRY1_15619</i>      | 0.4293   | 140 | <i>DNAJC28_26653</i> | 0.4293   |     |                       |          |
| 41  | <i>MAGEB4_27479</i>   | 0.4293   | 91  | <i>MOV10_15708</i>     | 0.4293   | 141 | <i>MYO9A_26663</i>   | 0.4293   |     |                       |          |
| 42  | <i>FAM166A_28865</i>  | 0.4293   | 92  | <i>CXCL5_15735</i>     | 0.4293   | 142 | <i>LRRC70_27457</i>  | 0.4293   |     |                       |          |
| 43  | <i>FCHO1_28745</i>    | 0.4293   | 93  | <i>FRMD6_15845</i>     | 0.4293   | 143 | <i>FBXO32_28461</i>  | 0.4293   |     |                       |          |
| 44  | <i>FAM193A_28885</i>  | 0.4293   | 94  | <i>STNI_16142</i>      | 0.4293   | 144 | <i>PIGBOS1_33704</i> | 0.4293   |     |                       |          |
| 45  | <i>NBPF8_34048</i>    | 0.4293   | 95  | <i>HOXB13_16208</i>    | 0.4293   | 145 | <i>ZKSCAN7_33685</i> | 0.4293   |     |                       |          |
| 46  | <i>TMEM42_87522</i>   | 0.4293   | 96  | <i>ZNF746_16282</i>    | 0.4293   | 146 | <i>DAP_33810</i>     | 0.4293   |     |                       |          |
| 47  | <i>OR13A1_87645</i>   | 0.4293   | 97  | <i>ISMI_16436</i>      | 0.4293   | 147 | <i>TRGV8_88081</i>   | 0.4293   |     |                       |          |
| 48  | <i>PGK2_88355</i>     | 0.4293   | 98  | <i>ELK1_16569</i>      | 0.4293   | 148 | <i>CPSF4L_88631</i>  | 0.4293   |     |                       |          |
| 49  | <i>UBA7_88387</i>     | 0.4293   | 99  | <i>ATP7A_16851</i>     | 0.4293   | 149 | <i>ANP32D_88632</i>  | 0.4293   |     |                       |          |
| 50  | <i>TRBV30_88551</i>   | 0.4293   | 100 | <i>TNFRSF12A_17257</i> | 0.4293   | 150 | <i>TRBV27_88690</i>  | 0.4293   |     |                       |          |

MI was computed between each gene's expression and the binary TB label; higher MI indicates greater class discriminability. Ties at the maximum score reflect the ranking behavior of the estimator.

**Abbreviations:** MI, mutual information; TB, tumor budding; TNBC, triple-negative breast cancer.

**Table S3.** Enriched pathways among diffusion-ranked PPI neighbors of the 7 biomarkers (GO Biological Processes and KEGG)

| Terms      | Group | Description                                         | Symbols                                                                                                                                                                 | Pathway size | Gene ratio | P value  |
|------------|-------|-----------------------------------------------------|-------------------------------------------------------------------------------------------------------------------------------------------------------------------------|--------------|------------|----------|
| GO:0035567 | 1     | non-canonical Wnt signaling pathway                 | <i>DVL1, DVL3, CELSR3, CELSR2, FZD2, PTK7, RYK, WNT11, FZD3, FZD1, FZD6, FZD7, FZD8, FZD9, CELSR1, DAAMI, VANGL2, VANGL1, PRICKLE2</i>                                  | 52           | 0.3654     | 4.00E-29 |
| GO:0060071 | 1     | Wnt signaling pathway, planar cell polarity pathway | <i>DVL1, DVL3, CELSR3, CELSR2, FZD2, PTK7, RYK, WNT11, FZD3, FZD1, FZD6, FZD7, CELSR1, DAAMI, VANGL2, VANGL1, PRICKLE2</i>                                              | 37           | 0.4595     | 2.72E-28 |
| hsa04310   | 1     | Wnt signaling pathway                               | <i>CSNK1E, DVL1, DVL3, FZD2, PRICKLE3, RYK, WNT11, FZD3, FZD1, FZD6, FZD7, FZD8, FZD9, DAAMI, DAAM2, INVS, PRICKLE4, VANGL2, VANGL1, NKD2, PRICKLE2</i>                 | 174          | 0.1207     | 5.53E-21 |
| GO:0016055 | 1     | Wnt signaling pathway                               | <i>CSNK1E, DVL1, DVL3, CELSR3, CELSR2, FZD2, PTK7, RYK, STK4, WNT11, FZD3, FZD1, FZD6, FZD7, FZD8, FZD9, CELSR1, DAAMI, DAAM2, INVS, VANGL2, VANGL1, NKD2, PRICKLE2</i> | 278          | 0.0863     | 2.38E-20 |
| GO:0198738 | 1     | cell-cell signaling by wnt                          | <i>CSNK1E, DVL1, DVL3, CELSR3, CELSR2, FZD2, PTK7, RYK, STK4, WNT11, FZD3, FZD1, FZD6, FZD7, FZD8, FZD9, CELSR1, DAAMI, DAAM2, INVS, VANGL2, VANGL1, NKD2, PRICKLE2</i> | 278          | 0.0863     | 2.38E-20 |
| GO:0000041 | 2     | transition metal ion transport                      | <i>ATP7A, ATP7B, SLC31A1, SLC31A2, CP, SLC30A1, SLC30A4, HEPH, SLC30A9, CUTC, SLC30A6, SLC30A5, SLC30A7, HEPHL1</i>                                                     | 97           | 0.1443     | 1.72E-15 |
| GO:0006825 | 3     | copper ion transport                                | <i>ATP7A, ATP7B, SLC31A1, SLC31A2, CP, HEPH, CUTC, HEPHL1</i>                                                                                                           | 18           | 0.4444     | 8.95E-14 |
| GO:0060070 | 1     | canonical Wnt signaling pathway                     | <i>CSNK1E, DVL1, DVL3, FZD2, RYK, STK4, WNT11, FZD3, FZD1, FZD6, FZD7, FZD8, FZD9</i>                                                                                   | 103          | 0.1262     | 1.08E-13 |
| GO:0007601 | 4     | visual perception                                   | <i>CACNA1F, COL11A1, GNAT1, GRM6, TRPM1, RDH5, GRK1, RS1, SLC24A1, RRH, CABP4, NYX, CACNA2D4, LRIT3, RGS9BP, GPR179</i>                                                 | 219          | 0.0731     | 8.30E-13 |

| Terms      | Group | Description                          | Symbols                                                                                                                                              | Pathway size | Gene ratio | P value  |
|------------|-------|--------------------------------------|------------------------------------------------------------------------------------------------------------------------------------------------------|--------------|------------|----------|
| GO:0050953 | 4     | sensory perception of light stimulus | <i>CACNA1F, COL11A1, GNAT1, GRM6, TRPM1, RDH5, GRK1, RS1, SLC24A1, RRH, CABP4, NYX, CACNA2D4, LRIT3, RGS9BP, GPR179</i>                              | 223          | 0.0717     | 1.10E-12 |
| hsa05217   | 1     | Basal cell carcinoma                 | <i>DVL1, DVL3, FZD2, WNT11, FZD3, FZD1, FZD6, FZD7, FZD8, FZD9</i>                                                                                   | 63           | 0.1587     | 7.51E-12 |
| GO:0055070 | 3     | copper ion homeostasis               | <i>ATP7A, ATP7B, SLC31A1, SLC31A2, CP, MT2A, CUTC</i>                                                                                                | 20           | 0.3500     | 2.57E-11 |
| GO:0098771 | 2     | inorganic ion homeostasis            | <i>ATP7A, ATP7B, SLC31A1, SLC31A2, CP, HRC, MC3R, MT1A, MT2A, SLC30A1, FZD9, SLC24A1, SLC30A9, CUTC, SLC30A5, ATP13A3, TMEM178A, SLC30A7, HEPHL1</i> | 430          | 0.0442     | 4.00E-11 |
| GO:0001736 | 1     | establishment of planar polarity     | <i>PTK7, FZD3, FZD6, CELSR1, INTU, WDPCP, VANGL2</i>                                                                                                 | 26           | 0.2692     | 2.11E-10 |
| GO:0007164 | 1     | establishment of tissue polarity     | <i>PTK7, FZD3, FZD6, CELSR1, INTU, WDPCP, VANGL2</i>                                                                                                 | 26           | 0.2692     | 2.11E-10 |
| GO:0009583 | 4     | detection of light stimulus          | <i>CACNA1F, GNAT1, GRM6, GRK1, RS1, RRH, CABP4, CACNA2D4, RGS9BP</i>                                                                                 | 63           | 0.1429     | 2.30E-10 |
| GO:0021915 | 1     | neural tube development              | <i>DVL1, DVL3, FZD2, PTK7, STK4, FZD3, FZD1, FZD6, CELSR1, INTU, WDPCP, VANGL2</i>                                                                   | 157          | 0.0764     | 3.84E-10 |
| hsa04390   | 1     | Hippo signaling pathway              | <i>CSNK1E, DVL1, DVL3, FZD2, WNT11, FZD3, FZD1, FZD6, FZD7, FZD8, FZD9, NKD2</i>                                                                     | 157          | 0.0764     | 3.84E-10 |
| GO:0055080 | 2     | monoatomic cation homeostasis        | <i>ATP7A, ATP7B, SLC31A1, SLC31A2, CP, HRC, MC3R, MT1A, MT2A, SLC30A1, FZD9, SLC24A1, SLC30A9, CUTC, SLC30A5, ATP13A3, TMEM178A, SLC30A7, HEPHL1</i> | 497          | 0.0382     | 4.60E-10 |
| GO:0009584 | 4     | detection of visible light           | <i>CACNA1F, GNAT1, GRM6, GRK1, RS1, RRH, CACNA2D4, RGS9BP</i>                                                                                        | 47           | 0.1702     | 5.50E-10 |
| GO:0006878 | 3     | intracellular copper ion homeostasis | <i>ATP7A, ATP7B, SLC31A1, SLC31A2, CP, MT2A</i>                                                                                                      | 17           | 0.3529     | 6.79E-10 |
| GO:0072175 | 1     | epithelial tube formation            | <i>DVL1, DVL3, FZD2, PTK7, STK4, FZD3, FZD1, FZD6, CELSR1, VANGL2, CEP290</i>                                                                        | 130          | 0.0846     | 7.11E-10 |

| Terms      | Group | Description                                                                    | Symbols                                                                                                                                  | Pathway size | Gene ratio | P value  |
|------------|-------|--------------------------------------------------------------------------------|------------------------------------------------------------------------------------------------------------------------------------------|--------------|------------|----------|
| hsa04916   | 1     | Melanogenesis                                                                  | <i>DVL1, DVL3, FZD2, WNT11, FZD3, FZD1, FZD6, FZD7, FZD8, FZD9</i>                                                                       | 101          | 0.0990     | 9.18E-10 |
| GO:0009581 | 4     | detection of external stimulus                                                 | <i>CACNA1F, COL11A1, GNAT1, GRM6, NGFR, GRK1, RSI, RRH, CABP4, CACNA2D4, RGS9BP</i>                                                      | 134          | 0.0821     | 9.84E-10 |
| GO:0001841 | 1     | neural tube formation                                                          | <i>DVL1, DVL3, FZD2, PTK7, STK4, FZD3, FZD1, FZD6, CELSRI, VANGL2</i>                                                                    | 102          | 0.0980     | 1.01E-09 |
| GO:0009582 | 4     | detection of abiotic stimulus                                                  | <i>CACNA1F, COL11A1, GNAT1, GRM6, NGFR, GRK1, RSI, RRH, CABP4, CACNA2D4, RGS9BP</i>                                                      | 137          | 0.0803     | 1.25E-09 |
| GO:0030003 | 2     | intracellular monoatomic cation homeostasis                                    | <i>ATP7A, ATP7B, SLC31A1, SLC31A2, CP, HRC, MT1A, MT2A, SLC30A1, FZD9, SLC24A1, SLC30A9, SLC30A5, ATP13A3, TMEM178A, SLC30A7, HEPHL1</i> | 423          | 0.0402     | 1.87E-09 |
| GO:0035148 | 1     | tube formation                                                                 | <i>DVL1, DVL3, FZD2, PTK7, STK4, FZD3, FZD1, FZD6, CELSRI, VANGL2, CEP290</i>                                                            | 144          | 0.0764     | 2.12E-09 |
| GO:0006882 | 2     | intracellular zinc ion homeostasis                                             | <i>ATP7B, MT1A, MT2A, SLC30A1, SLC30A9, SLC30A5, SLC30A7</i>                                                                             | 36           | 0.1944     | 2.54E-09 |
| GO:0006873 | 2     | intracellular monoatomic ion homeostasis                                       | <i>ATP7A, ATP7B, SLC31A1, SLC31A2, CP, HRC, MT1A, MT2A, SLC30A1, FZD9, SLC24A1, SLC30A9, SLC30A5, ATP13A3, TMEM178A, SLC30A7, HEPHL1</i> | 432          | 0.0394     | 2.57E-09 |
| hsa04978   | 5     | Mineral absorption                                                             | <i>ATP7A, ATP7B, SLC31A1, MT1A, MT2A, SLC30A1, HEPH, HEPHL1</i>                                                                          | 60           | 0.1333     | 4.18E-09 |
| GO:0090178 | 1     | regulation of establishment of planar polarity involved in neural tube closure | <i>DVL1, DVL3, FZD2, PTK7, FZD1</i>                                                                                                      | 11           | 0.4545     | 4.24E-09 |
| GO:0062111 | 2     | zinc ion import into organelle                                                 | <i>SLC30A1, SLC30A4, SLC30A6, SLC30A5, SLC30A7</i>                                                                                       | 11           | 0.4545     | 4.24E-09 |
| hsa04934   | 1     | Cushing syndrome                                                               | <i>CACNA1F, DVL1, DVL3, FZD2, WNT11, FZD3, FZD1, FZD6, FZD7, FZD8, FZD9</i>                                                              | 155          | 0.0710     | 4.62E-09 |

| Terms      | Group | Description                                              | Symbols                                                                                                               | Pathway size | Gene ratio | P value  |
|------------|-------|----------------------------------------------------------|-----------------------------------------------------------------------------------------------------------------------|--------------|------------|----------|
| GO:0001843 | 1     | neural tube closure                                      | <i>DVL1, DVL3, FZD2, PTK7, FZD3, FZD1, FZD6, CELSR1, VANGL2</i>                                                       | 89           | 0.1011     | 5.38E-09 |
| GO:0001838 | 1     | embryonic epithelial tube formation                      | <i>DVL1, DVL3, FZD2, PTK7, STK4, FZD3, FZD1, FZD6, CELSR1, VANGL2</i>                                                 | 122          | 0.0820     | 5.87E-09 |
| GO:0060606 | 1     | tube closure                                             | <i>DVL1, DVL3, FZD2, PTK7, FZD3, FZD1, FZD6, CELSR1, VANGL2</i>                                                       | 90           | 0.1000     | 5.94E-09 |
| GO:0002009 | 1     | morphogenesis of an epithelium                           | <i>ATP7A, DVL1, DVL3, FZD2, NGFR, PTK7, STK4, WNT11, FZD3, FZD1, FZD6, CELSR1, INTU, WDPCP, RIPK4, VANGL2, CEP290</i> | 458          | 0.0371     | 6.13E-09 |
| GO:0014020 | 1     | primary neural tube formation                            | <i>DVL1, DVL3, FZD2, PTK7, FZD3, FZD1, FZD6, CELSR1, VANGL2</i>                                                       | 95           | 0.0947     | 9.62E-09 |
| GO:0060828 | 7     | regulation of canonical Wnt signaling pathway            | <i>CSNK1E, PTK7, STK4, WNT11, FZD1, FZD6, FZD7, FZD9, PTPRU, ANKRD6, DAAM2, INVS, NKD2</i>                            | 268          | 0.0485     | 1.79E-08 |
| GO:0090175 | 1     | regulation of establishment of planar polarity           | <i>DVL1, DVL3, FZD2, PTK7, FZD1</i>                                                                                   | 14           | 0.3571     | 1.81E-08 |
| GO:0071577 | 2     | zinc ion transmembrane transport                         | <i>SLC30A1, SLC30A4, SLC30A9, SLC30A6, SLC30A5, SLC30A7</i>                                                           | 28           | 0.2143     | 1.95E-08 |
| GO:0090596 | 1     | sensory organ morphogenesis                              | <i>COL11A1, DVL1, FZD2, GNAT1, PTK7, RS1, FZD3, FZD6, FJX1, INTU, WDPCP, CABP4, CEP290</i>                            | 275          | 0.0473     | 2.43E-08 |
| GO:0001738 | 1     | morphogenesis of a polarized epithelium                  | <i>PTK7, FZD3, FZD6, CELSR1, INTU, WDPCP, VANGL2</i>                                                                  | 49           | 0.1429     | 2.44E-08 |
| GO:0006829 | 2     | zinc ion transport                                       | <i>SLC30A1, SLC30A4, SLC30A9, SLC30A6, SLC30A5, SLC30A7</i>                                                           | 29           | 0.2069     | 2.45E-08 |
| hsa04550   | 1     | Signaling pathways regulating pluripotency of stem cells | <i>DVL1, DVL3, FZD2, WNT11, FZD3, FZD1, FZD6, FZD7, FZD8, FZD9</i>                                                    | 143          | 0.0699     | 2.72E-08 |
| GO:0016331 | 1     | morphogenesis of embryonic epithelium                    | <i>DVL1, DVL3, FZD2, PTK7, STK4, FZD3, FZD1, FZD6, CELSR1, VANGL2</i>                                                 | 144          | 0.0694     | 2.90E-08 |
| GO:0010043 | 5     | response to zinc ion                                     | <i>ATP7A, MT1A, MT2A, MTF1, PAM, SLC30A1, SLC30A4</i>                                                                 | 51           | 0.1373     | 3.25E-08 |

| Terms      | Group | Description                                                | Symbols                                                                                                        | Pathway size | Gene ratio | P value  |
|------------|-------|------------------------------------------------------------|----------------------------------------------------------------------------------------------------------------|--------------|------------|----------|
| hsa05224   | 1     | Breast cancer                                              | <i>DVL1, DVL3, FZD2, WNT11, FZD3, FZD1, FZD6, FZD7, FZD8, FZD9</i>                                             | 147          | 0.0680     | 3.53E-08 |
| hsa05226   | 1     | Gastric cancer                                             | <i>DVL1, DVL3, FZD2, WNT11, FZD3, FZD1, FZD6, FZD7, FZD8, FZD9</i>                                             | 149          | 0.0671     | 4.02E-08 |
| hsa04150   | 1     | mTOR signaling pathway                                     | <i>DVL1, DVL3, FZD2, WNT11, FZD3, FZD1, FZD6, FZD7, FZD8, FZD9</i>                                             | 156          | 0.0641     | 6.21E-08 |
| hsa05225   | 1     | Hepatocellular carcinoma                                   | <i>DVL1, DVL3, FZD2, WNT11, FZD3, FZD1, FZD6, FZD7, FZD8, FZD9</i>                                             | 168          | 0.0595     | 1.25E-07 |
| GO:0048667 | 6     | cell morphogenesis involved in neuron differentiation      | <i>DVL1, CELSR3, CELSR2, NGFR, PTK7, RYK, FZD3, SEMA6B, NTNG1, WDPCP, CNTN5, PLXNA3, CABP4, VANGL2, PLXNA4</i> | 440          | 0.0341     | 1.49E-07 |
| GO:0007411 | 6     | axon guidance                                              | <i>DVL1, CELSR3, NGFR, PTK7, RYK, FZD3, SEMA6B, CNTN5, PLXNA3, VANGL2, PLXNA4</i>                              | 225          | 0.0489     | 2.13E-07 |
| GO:0097485 | 6     | neuron projection guidance                                 | <i>DVL1, CELSR3, NGFR, PTK7, RYK, FZD3, SEMA6B, CNTN5, PLXNA3, VANGL2, PLXNA4</i>                              | 225          | 0.0489     | 2.13E-07 |
| GO:0050908 | 4     | detection of light stimulus involved in visual perception  | <i>CACNA1F, GNAT1, GRM6, CACNA2D4, RGS9BP</i>                                                                  | 22           | 0.2273     | 2.28E-07 |
| GO:0050962 | 4     | detection of light stimulus involved in sensory perception | <i>CACNA1F, GNAT1, GRM6, CACNA2D4, RGS9BP</i>                                                                  | 22           | 0.2273     | 2.28E-07 |
| GO:0030111 | 7     | regulation of Wnt signaling pathway                        | <i>CSNK1E, PTK7, STK4, WNT11, FZD1, FZD6, FZD7, FZD9, PTPRU, ANKRD6, DAAM2, INVS, NKD2</i>                     | 342          | 0.0380     | 3.04E-07 |
| GO:0042472 | 1     | inner ear morphogenesis                                    | <i>COL11A1, DVL1, FZD2, PTK7, FZD3, FZD6, WDPCP, CEP290</i>                                                    | 105          | 0.0762     | 3.57E-07 |
| GO:0060562 | 1     | epithelial tube morphogenesis                              | <i>DVL1, DVL3, FZD2, PTK7, STK4, WNT11, FZD3, FZD1, FZD6, CELSR1, VANGL2, CEP290</i>                           | 314          | 0.0382     | 8.29E-07 |
| GO:0042471 | 1     | ear morphogenesis                                          | <i>COL11A1, DVL1, FZD2, PTK7, FZD3, FZD6, WDPCP, CEP290</i>                                                    | 126          | 0.0635     | 1.44E-06 |

| Terms      | Group | Description                                                | Symbols                                                                                                 | Pathway size | Gene ratio | P value  |
|------------|-------|------------------------------------------------------------|---------------------------------------------------------------------------------------------------------|--------------|------------|----------|
| GO:0030178 | 7     | negative regulation of Wnt signaling pathway               | <i>CSNK1E, STK4, WNT11, FZD1, FZD6, PTPRU, ANKRD6, INVS, NKD2</i>                                       | 177          | 0.0508     | 2.01E-06 |
| GO:0048812 | 6     | neuron projection morphogenesis                            | <i>ATP7A, DVLI, CELSR3, CELSR2, NGFR, PTK7, RYK, FZD3, SEMA6B, NTNG1, CNTN5, PLXNA3, VANGL2, PLXNA4</i> | 484          | 0.0289     | 2.71E-06 |
| GO:0048562 | 1     | embryonic organ morphogenesis                              | <i>COL11A1, DVLI, FZD2, HOXD3, PTK7, WNT11, FZD3, FZD6, WDPCP, VANGL2, CEP290</i>                       | 295          | 0.0373     | 3.04E-06 |
| GO:0120039 | 6     | plasma membrane bounded cell projection morphogenesis      | <i>ATP7A, DVLI, CELSR3, CELSR2, NGFR, PTK7, RYK, FZD3, SEMA6B, NTNG1, CNTN5, PLXNA3, VANGL2, PLXNA4</i> | 489          | 0.0286     | 3.05E-06 |
| GO:2000179 | 12    | positive regulation of neural precursor cell proliferation | <i>HAPLN1, RYK, FZD3, FZD9, HAPLN3, HAPLN4</i>                                                          | 64           | 0.0938     | 3.22E-06 |
| GO:0048858 | 6     | cell projection morphogenesis                              | <i>ATP7A, DVLI, CELSR3, CELSR2, NGFR, PTK7, RYK, FZD3, SEMA6B, NTNG1, CNTN5, PLXNA3, VANGL2, PLXNA4</i> | 494          | 0.0283     | 3.43E-06 |
| GO:0007409 | 6     | axonogenesis                                               | <i>DVLI, CELSR3, NGFR, PTK7, RYK, FZD3, SEMA6B, NTNG1, CNTN5, PLXNA3, VANGL2, PLXNA4</i>                | 366          | 0.0328     | 4.05E-06 |
| GO:0090090 | 7     | negative regulation of canonical Wnt signaling pathway     | <i>STK4, WNT11, FZD1, FZD6, PTPRU, ANKRD6, INVS, NKD2</i>                                               | 145          | 0.0552     | 4.12E-06 |
| GO:0009416 | 4     | response to light stimulus                                 | <i>CACNA1F, GNAT1, GRM6, TRPM1, GRK1, RSI, SLC24A1, RRH, CABP4, CACNA2D4, RGS9BP</i>                    | 315          | 0.0349     | 5.68E-06 |
| hsa05205   | 1     | Proteoglycans in cancer                                    | <i>FZD2, WNT11, FZD3, FZD1, FZD6, FZD7, FZD8, FZD9, MRAS</i>                                            | 203          | 0.0443     | 6.16E-06 |
| hsa05010   | 1     | Alzheimer disease                                          | <i>CACNA1F, CSNK1E, DVLI, DVL3, FZD2, WNT11, FZD3, FZD1, FZD6, FZD7, FZD8, FZD9</i>                     | 384          | 0.0313     | 6.58E-06 |
| GO:0048568 | 1     | embryonic organ development                                | <i>COL11A1, DVLI, FZD2, HOXD3, PTK7, STK4, WNT11, FZD3, FZD6, WDPCP, VANGL2, CEP290, PLXNA4</i>         | 452          | 0.0288     | 6.61E-06 |
| GO:0007602 | 4     | phototransduction                                          | <i>GNAT1, GRK1, RSI, RRH, CABP4</i>                                                                     | 42           | 0.1190     | 6.66E-06 |

| Terms      | Group | Description                                               | Symbols                                                                                  | Pathway size | Gene ratio | P value  |
|------------|-------|-----------------------------------------------------------|------------------------------------------------------------------------------------------|--------------|------------|----------|
| GO:0098742 | 13    | cell-cell adhesion via plasma-membrane adhesion molecules | <i>CELSR3, CELSR2, PTK7, CELSR1, NTNG1, ADGRL1, ADGRL3, PCDH11X, FAT4, AMIGO3</i>        | 261          | 0.0383     | 6.80E-06 |
| GO:0097501 | 5     | stress response to metal ion                              | <i>ATP7A, MT1A, MT2A, SLC30A1</i>                                                        | 21           | 0.1905     | 8.43E-06 |
| GO:0061687 | 5     | detoxification of inorganic compound                      | <i>ATP7A, MT1A, MT2A, SLC30A1</i>                                                        | 22           | 0.1818     | 1.03E-05 |
| GO:0050808 | 11    | synapse organization                                      | <i>DVL1, PTK7, RYK, FZD1, FZD9, NTNG1, ADGRL3, CNTN5, PLXNA4, ELFN1, HAPLN4</i>          | 337          | 0.0326     | 1.07E-05 |
| hsa05022   | 1     | Pathways of neurodegeneration - multiple diseases         | <i>CACNA1F, CSNK1E, DVL1, DVL3, FZD2, WNT11, FZD3, FZD1, FZD6, FZD7, FZD8, FZD9, CCS</i> | 476          | 0.0273     | 1.15E-05 |
| GO:0061564 | 6     | axon development                                          | <i>DVL1, CELSR3, NGFR, PTK7, RYK, FZD3, SEMA6B, NTNG1, CNTN5, PLXNA3, VANGL2, PLXNA4</i> | 421          | 0.0285     | 1.65E-05 |
| GO:2000027 | 1     | regulation of animal organ morphogenesis                  | <i>DVL1, DVL3, FZD2, NGFR, PTK7, FZD1</i>                                                | 89           | 0.0674     | 2.19E-05 |
| GO:0060021 | 1     | roof of mouth development                                 | <i>FZD2, WNT11, FZD1, INTU, WDPCP, WFIKKN2</i>                                           | 91           | 0.0659     | 2.48E-05 |
| GO:0098754 | 5     | detoxification                                            | <i>ATP7A, ATP7B, CP, MT1A, MT2A, SLC30A1, CCS</i>                                        | 138          | 0.0507     | 2.87E-05 |
| GO:0048839 | 1     | inner ear development                                     | <i>COL11A1, DVL1, FZD2, PTK7, FZD3, FZD6, WDPCP, CEP290</i>                              | 194          | 0.0412     | 3.42E-05 |
| GO:0046686 | 5     | response to cadmium ion                                   | <i>ATP7A, MT1A, MT2A, MTF1, SLC30A1</i>                                                  | 60           | 0.0833     | 3.90E-05 |
| GO:2000177 | 12    | regulation of neural precursor cell proliferation         | <i>HAPLN1, RYK, FZD3, FZD9, HAPLN3, HAPLN4</i>                                           | 102          | 0.0588     | 4.74E-05 |
| hsa05165   | 1     | Human papillomavirus infection                            | <i>DVL1, DVL3, FZD2, WNT11, FZD3, FZD1, FZD6, FZD7, FZD8, FZD9</i>                       | 331          | 0.0302     | 5.20E-05 |
| GO:0060491 | 17    | regulation of cell projection assembly                    | <i>ATP7A, DAAM2, SH3YL1, INTU, WDPCP, CEP120, MAPK15, FAM110C</i>                        | 206          | 0.0388     | 5.23E-05 |

| Terms      | Group | Description                                            | Symbols                                                                              | Pathway size | Gene ratio | P value  |
|------------|-------|--------------------------------------------------------|--------------------------------------------------------------------------------------|--------------|------------|----------|
| GO:0048841 | 6     | regulation of axon extension involved in axon guidance | <i>RYK, SEMA6B, PLXNA3, PLXNA4</i>                                                   | 34           | 0.1176     | 6.13E-05 |
| GO:0007603 | 4     | phototransduction, visible light                       | <i>GNAT1, GRK1, RSI</i>                                                              | 13           | 0.2308     | 6.74E-05 |
| GO:0060026 | 18    | convergent extension                                   | <i>DVL1, PTK7, WNT11</i>                                                             | 13           | 0.2308     | 6.74E-05 |
| GO:0034329 | 11    | cell junction assembly                                 | <i>DVL1, RYK, WNT11, FZD1, ADGRL3, RHOD, CNTN5, ILDR1, HAPLN4</i>                    | 283          | 0.0318     | 8.38E-05 |
| GO:0043583 | 1     | ear development                                        | <i>COL11A1, DVL1, FZD2, PTK7, FZD3, FZD6, WDPCP, CEP290</i>                          | 221          | 0.0362     | 8.55E-05 |
| GO:0002052 | 12    | positive regulation of neuroblast proliferation        | <i>HAPLN1, FZD3, HAPLN3, HAPLN4</i>                                                  | 37           | 0.1081     | 8.60E-05 |
| GO:0009314 | 4     | response to radiation                                  | <i>CACNA1F, GNAT1, GRM6, TRPM1, GRK1, RSI, SLC24A1, RRH, CABP4, CACNA2D4, RGS9BP</i> | 424          | 0.0259     | 8.64E-05 |
| GO:0046688 | 5     | response to copper ion                                 | <i>ATP7A, ATP7B, MT1A, MT2A</i>                                                      | 38           | 0.1053     | 9.57E-05 |
| GO:0007416 | 11    | synapse assembly                                       | <i>DVL1, RYK, FZD1, ADGRL3, CNTN5, HAPLN4</i>                                        | 117          | 0.0513     | 0.000102 |
| GO:0031346 | 6     | positive regulation of cell projection organization    | <i>ATP7A, DVL1, DVL3, LTK, PTK7, FZD1, PLXNA3, PLXNA4, CEP120, ALKAL2</i>            | 360          | 0.0278     | 0.000104 |
| GO:0150011 | 15    | regulation of neuron projection arborization           | <i>DVL1, DVL3, NTNG1</i>                                                             | 15           | 0.2000     | 0.000106 |
| GO:0070509 | 19    | calcium ion import                                     | <i>CACNA1F, TRPM1, SLC30A1, SLC24A1</i>                                              | 40           | 0.1000     | 0.000117 |
| GO:0010273 | 5     | detoxification of copper ion                           | <i>ATP7A, MT1A, MT2A</i>                                                             | 16           | 0.1875     | 0.000130 |
| GO:1990169 | 5     | stress response to copper ion                          | <i>ATP7A, MT1A, MT2A</i>                                                             | 16           | 0.1875     | 0.000130 |
| GO:0009636 | 5     | response to toxic substance                            | <i>ATP7A, ATP7B, CP, MT1A, MT2A, SLC30A1, SLC30A4, CCS</i>                           | 240          | 0.0333     | 0.000151 |
| GO:0001942 | 17    | hair follicle development                              | <i>ATP7A, NGFR, FZD3, FZD6, INTU</i>                                                 | 80           | 0.0625     | 0.000155 |

| Terms      | Group | Description                                                    | Symbols                                                                               | Pathway size | Gene ratio | P value  |
|------------|-------|----------------------------------------------------------------|---------------------------------------------------------------------------------------|--------------|------------|----------|
| hsa04360   | 6     | Axon guidance                                                  | <i>RYK, FZD3, SEMA6B, NTNG1, RHOD, PLXNA3, PLXNA4</i>                                 | 182          | 0.0385     | 0.000164 |
| GO:0010975 | 6     | regulation of neuron projection development                    | <i>DVL1, LTK, PTK7, RYK, FZD1, SEMA6B, NTNG1, PLXNA3, PLXNA4, ALKAL2, AMIGO3</i>      | 460          | 0.0239     | 0.000176 |
| GO:0009642 | 4     | response to light intensity                                    | <i>GNAT1, RSI, SLC24A1</i>                                                            | 18           | 0.1667     | 0.000188 |
| GO:0022404 | 17    | molting cycle process                                          | <i>ATP7A, NGFR, FZD3, FZD6, INTU</i>                                                  | 84           | 0.0595     | 0.000195 |
| GO:0022405 | 17    | hair cycle process                                             | <i>ATP7A, NGFR, FZD3, FZD6, INTU</i>                                                  | 84           | 0.0595     | 0.000195 |
| GO:0050919 | 6     | negative chemotaxis                                            | <i>RYK, SEMA6B, PLXNA3, PLXNA4</i>                                                    | 46           | 0.0870     | 0.000203 |
| GO:0051960 | 12    | regulation of nervous system development                       | <i>HAPLN1, PCMI, RYK, FZD3, SEMA6B, DAAM2, PLXNA3, PLXNA4, HAPLN3, AMIGO3, HAPLN4</i> | 468          | 0.0235     | 0.000204 |
| GO:0050767 | 12    | regulation of neurogenesis                                     | <i>HAPLN1, PCMI, RYK, FZD3, SEMA6B, DAAM2, PLXNA3, PLXNA4, HAPLN3, HAPLN4</i>         | 393          | 0.0254     | 0.000212 |
| GO:0099054 | 11    | presynapse assembly                                            | <i>DVL1, FZD1, CNTN5</i>                                                              | 19           | 0.1579     | 0.000222 |
| GO:0006874 | 20    | intracellular calcium ion homeostasis                          | <i>ATP7B, HRC, SLC30A1, FZD9, SLC24A1, ATP13A3, TMEM178A</i>                          | 200          | 0.0350     | 0.000292 |
| GO:0001764 | 13    | neuron migration                                               | <i>CELSR2, PCMI, FZD3, CELSR1, ADGRL3, PLXNA3</i>                                     | 142          | 0.0423     | 0.000293 |
| GO:0120032 | 17    | regulation of plasma membrane bounded cell projection assembly | <i>ATP7A, DAAM2, SH3YL1, INTU, WDPCP, CEP120, MAPK15</i>                              | 204          | 0.0343     | 0.000329 |
| GO:1902692 | 12    | regulation of neuroblast proliferation                         | <i>HAPLN1, FZD3, HAPLN3, HAPLN4</i>                                                   | 53           | 0.0755     | 0.000353 |
| GO:0042303 | 17    | molting cycle                                                  | <i>ATP7A, NGFR, FZD3, FZD6, INTU</i>                                                  | 96           | 0.0521     | 0.000364 |
| GO:0042633 | 17    | hair cycle                                                     | <i>ATP7A, NGFR, FZD3, FZD6, INTU</i>                                                  | 96           | 0.0521     | 0.000364 |
| GO:0090103 | 1     | cochlea morphogenesis                                          | <i>DVL1, FZD2, PTK7</i>                                                               | 24           | 0.1250     | 0.000453 |
| GO:0071294 | 5     | cellular response to zinc ion                                  | <i>MT1A, MT2A, MTF1</i>                                                               | 24           | 0.1250     | 0.000453 |

| Terms      | Group | Description                                                     | Symbols                                                      | Pathway size | Gene ratio | P value  |
|------------|-------|-----------------------------------------------------------------|--------------------------------------------------------------|--------------|------------|----------|
| GO:1905515 | 9     | non-motile cilium assembly                                      | <i>PCMI, INTU, VANGL2, CEP290</i>                            | 57           | 0.0702     | 0.000466 |
| GO:0061351 | 1     | neural precursor cell proliferation                             | <i>PCMI, FZD3, FZD6, FZD9, CEP120</i>                        | 103          | 0.0485     | 0.000503 |
| GO:0099172 | 11    | presynapse organization                                         | <i>DVLI, FZD1, CNTN5</i>                                     | 25           | 0.1200     | 0.000513 |
| GO:0062009 | 1     | secondary palate development                                    | <i>FZD2, WNT11, FZD1</i>                                     | 26           | 0.1154     | 0.000577 |
| GO:0071280 | 5     | cellular response to copper ion                                 | <i>ATP7A, MT1A, MT2A</i>                                     | 26           | 0.1154     | 0.000577 |
| GO:0055074 | 20    | calcium ion homeostasis                                         | <i>ATP7B, HRC, SLC30A1, FZD9, SLC24A1, ATP13A3, TMEM178A</i> | 227          | 0.0308     | 0.000622 |
| GO:0007156 | 13    | homophilic cell adhesion via plasma membrane adhesion molecules | <i>CELSR3, CELSR2, PTK7, CELSR1, PCDH11X, FAT4</i>           | 167          | 0.0359     | 0.000691 |
| GO:0048843 | 6     | negative regulation of axon extension involved in axon guidance | <i>RYK, SEMA6B, PLXNA3</i>                                   | 28           | 0.1071     | 0.000720 |
| GO:0098703 | 19    | calcium ion import across plasma membrane                       | <i>CACNA1F, TRPM1, SLC24A1</i>                               | 28           | 0.1071     | 0.000720 |
| hsa04744   | 4     | Phototransduction                                               | <i>GNAT1, GRK1, SLC24A1</i>                                  | 29           | 0.1034     | 0.000800 |
| GO:1902656 | 19    | calcium ion import into cytosol                                 | <i>CACNA1F, TRPM1, SLC24A1</i>                               | 29           | 0.1034     | 0.000800 |
| GO:0071482 | 4     | cellular response to light stimulus                             | <i>GNAT1, TRPM1, GRK1, RSI, RRH</i>                          | 115          | 0.0435     | 0.000829 |
| GO:0098773 | 17    | skin epidermis development                                      | <i>ATP7A, NGFR, FZD3, FZD6, INTU</i>                         | 115          | 0.0435     | 0.000829 |
| GO:0071300 | 18    | cellular response to retinoic acid                              | <i>LTK, PTK7, WNT11, FZD7</i>                                | 68           | 0.0588     | 0.000911 |

| Terms      | Group | Description                                      | Symbols                                                             | Pathway size | Gene ratio | P value  |
|------------|-------|--------------------------------------------------|---------------------------------------------------------------------|--------------|------------|----------|
| GO:0021602 | 6     | cranial nerve morphogenesis                      | <i>HOXD3, PLXNA3, PLXNA4</i>                                        | 31           | 0.0968     | 0.000974 |
| GO:0045926 | 6     | negative regulation of growth                    | <i>MT1A, MT2A, RYK, STK4, WNT11, SEMA6B, PLXNA3</i>                 | 247          | 0.0283     | 0.001019 |
| GO:0031069 | 17    | hair follicle morphogenesis                      | <i>ATP7A, NGFR, INTU</i>                                            | 33           | 0.0909     | 0.001172 |
| GO:0003281 | 1     | ventricular septum development                   | <i>FZD2, PTK7, WNT11, FZD1</i>                                      | 74           | 0.0541     | 0.001250 |
| GO:1902017 | 17    | regulation of cilium assembly                    | <i>INTU, WDPCP, CEP120, MAPK15</i>                                  | 74           | 0.0541     | 0.001250 |
| GO:0003231 | 1     | cardiac ventricle development                    | <i>COL11A1, FZD2, PTK7, WNT11, FZD1</i>                             | 127          | 0.0394     | 0.001293 |
| GO:0060271 | 9     | cilium assembly                                  | <i>CELSR2, PCMI, OFD1, INTU, WDPCP, CEP83, VANGL2, CEP290</i>       | 336          | 0.0238     | 0.001385 |
| GO:0040007 | 18    | growth                                           | <i>DVL1, GNAT1, PTK7, RYK, STK4, WNT11, FZD7, FZD9, PLXNA3</i>      | 424          | 0.0212     | 0.001563 |
| GO:0048589 | 18    | developmental growth                             | <i>DVL1, GNAT1, PTK7, RYK, STK4, WNT11, FZD7, FZD9, PLXNA3</i>      | 424          | 0.0212     | 0.001563 |
| GO:0071276 | 5     | cellular response to cadmium ion                 | <i>ATP7A, MT1A, MT2A</i>                                            | 37           | 0.0811     | 0.001638 |
| GO:0048730 | 17    | epidermis morphogenesis                          | <i>ATP7A, NGFR, INTU</i>                                            | 37           | 0.0811     | 0.001638 |
| GO:0003151 | 1     | outflow tract morphogenesis                      | <i>DVL1, FZD2, WNT11, FZD1</i>                                      | 80           | 0.0500     | 0.001668 |
| GO:0120031 | 9     | plasma membrane bounded cell projection assembly | <i>CELSR2, PCMI, OFD1, INTU, RHOD, WDPCP, CEP83, VANGL2, CEP290</i> | 431          | 0.0209     | 0.001747 |
| GO:0060560 | 18    | developmental growth involved in morphogenesis   | <i>DVL1, PTK7, RYK, WNT11, PLXNA3</i>                               | 137          | 0.0365     | 0.001806 |

| Terms      | Group | Description                                       | Symbols                                                             | Pathway size | Gene ratio | P value  |
|------------|-------|---------------------------------------------------|---------------------------------------------------------------------|--------------|------------|----------|
| GO:0010038 | 5     | response to metal ion                             | <i>ATP7A, ATP7B, MT1A, MT2A, MTF1, PAM, SLC30A1, SLC30A4</i>        | 360          | 0.0222     | 0.002130 |
| GO:0030031 | 9     | cell projection assembly                          | <i>CELSR2, PCMI, OFD1, INTU, RHOD, WDPCP, CEP83, VANGL2, CEP290</i> | 444          | 0.0203     | 0.002135 |
| GO:0071526 | 6     | semaphorin-plexin signaling pathway               | <i>SEMA6B, PLXNA3, PLXNA4</i>                                       | 41           | 0.0732     | 0.002207 |
| GO:0030901 | 1     | midbrain development                              | <i>RYK, FZD3, FZD1, FZD6</i>                                        | 88           | 0.0455     | 0.002366 |
| GO:0044782 | 9     | cilium organization                               | <i>CELSR2, PCMI, OFD1, INTU, WDPCP, CEP83, VANGL2, CEP290</i>       | 368          | 0.0217     | 0.002438 |
| GO:0010721 | 6     | negative regulation of cell development           | <i>PCMI, RYK, SEMA6B, DAAM2, TMEM176A, PLXNA3, TMEM178A</i>         | 288          | 0.0243     | 0.002439 |
| GO:0060412 | 1     | ventricular septum morphogenesis                  | <i>FZD2, WNT11, FZD1</i>                                            | 43           | 0.0698     | 0.002531 |
| GO:0050768 | 6     | negative regulation of neurogenesis               | <i>PCMI, RYK, SEMA6B, DAAM2, PLXNA3</i>                             | 149          | 0.0336     | 0.002603 |
| GO:0051962 | 12    | positive regulation of nervous system development | <i>HAPLN1, FZD3, PLXNA3, PLXNA4, HAPLN3, AMIGO3, HAPLN4</i>         | 294          | 0.0238     | 0.002735 |
| GO:0030516 | 6     | regulation of axon extension                      | <i>RYK, SEMA6B, PLXNA3, PLXNA4</i>                                  | 92           | 0.0435     | 0.002780 |
| GO:0030517 | 6     | negative regulation of axon extension             | <i>RYK, SEMA6B, PLXNA3</i>                                          | 46           | 0.0652     | 0.003071 |
| GO:0048483 | 6     | autonomic nervous system development              | <i>FZD3, PLXNA3, PLXNA4</i>                                         | 46           | 0.0652     | 0.003071 |
| hsa00860   | 10    | Porphyrim metabolism                              | <i>CP, HEPH, HEPHL1</i>                                             | 46           | 0.0652     | 0.003071 |
| GO:0048675 | 18    | axon extension                                    | <i>DVLI, RYK, PLXNA3</i>                                            | 46           | 0.0652     | 0.003071 |
| GO:0051961 | 6     | negative regulation of nervous system development | <i>PCMI, RYK, SEMA6B, DAAM2, PLXNA3</i>                             | 155          | 0.0323     | 0.003085 |

| Terms      | Group | Description                                                           | Symbols                                                       | Pathway size | Gene ratio | P value  |
|------------|-------|-----------------------------------------------------------------------|---------------------------------------------------------------|--------------|------------|----------|
| GO:0021675 | 6     | nerve development                                                     | <i>HOXD3, NGFR, PLXNA3, PLXNA4</i>                            | 97           | 0.0412     | 0.003364 |
| GO:0010976 | 6     | positive regulation of neuron projection development                  | <i>DVLI, LTK, PTK7, FZD1, ALKAL2</i>                          | 161          | 0.0311     | 0.003628 |
| GO:0042073 | 17    | intraciliary transport                                                | <i>PCMI, INTU, WDPCP</i>                                      | 49           | 0.0612     | 0.003676 |
| GO:0090102 | 1     | cochlea development                                                   | <i>DVLI, FZD2, PTK7</i>                                       | 50           | 0.0600     | 0.003892 |
| GO:0003205 | 1     | cardiac chamber development                                           | <i>COL11A1, FZD2, PTK7, WNT11, FZD1</i>                       | 168          | 0.0298     | 0.004345 |
| GO:0030900 | 6     | forebrain development                                                 | <i>ATP7A, PCMI, RYK, SEMA6B, PLXNA3, FAT4, PLXNA4, CEP120</i> | 407          | 0.0197     | 0.004475 |
| GO:0045197 | 18    | establishment or maintenance of epithelial cell apical/basal polarity | <i>PTK7, WNT11, PDZD11</i>                                    | 53           | 0.0566     | 0.004588 |
| GO:0032526 | 18    | response to retinoic acid                                             | <i>LTK, PTK7, WNT11, FZD7</i>                                 | 106          | 0.0377     | 0.004617 |
| GO:0071478 | 4     | cellular response to radiation                                        | <i>GNAT1, TRPM1, GRK1, RS1, RRH</i>                           | 172          | 0.0291     | 0.004797 |
| GO:0006826 | 10    | iron ion transport                                                    | <i>CP, HEPH, HEPHL1</i>                                       | 54           | 0.0556     | 0.004836 |
| GO:0050769 | 12    | positive regulation of neurogenesis                                   | <i>HAPLN1, FZD3, PLXNA3, PLXNA4, HAPLN3, HAPLN4</i>           | 246          | 0.0244     | 0.004840 |
| GO:0022604 | 15    | regulation of cell morphogenesis                                      | <i>DVLI, DVL3, NTNG1, WDPCP, PLXNA3, PLXNA4</i>               | 246          | 0.0244     | 0.004840 |
| GO:0003279 | 1     | cardiac septum development                                            | <i>FZD2, PTK7, WNT11, FZD1</i>                                | 108          | 0.0370     | 0.004933 |
| GO:0061387 | 6     | regulation of extent of cell growth                                   | <i>RYK, SEMA6B, PLXNA3, PLXNA4</i>                            | 109          | 0.0367     | 0.005096 |
| GO:1901800 | 15    | positive regulation of proteasomal protein catabolic process          | <i>CSNK1E, DVLI, NKD2, TMEM259</i>                            | 109          | 0.0367     | 0.005096 |

| Terms      | Group | Description                                                             | Symbols                                                | Pathway size | Gene ratio | P value  |
|------------|-------|-------------------------------------------------------------------------|--------------------------------------------------------|--------------|------------|----------|
| GO:0008544 | 17    | epidermis development                                                   | <i>ATP7A, NGFR, STK4, FZD3, FZD6, INTU, WDPCP</i>      | 335          | 0.0209     | 0.005557 |
| GO:0035088 | 18    | establishment or maintenance of apical/basal cell polarity              | <i>PTK7, WNT11, PDZD11</i>                             | 57           | 0.0526     | 0.005627 |
| GO:0061245 | 18    | establishment or maintenance of bipolar cell polarity                   | <i>PTK7, WNT11, PDZD11</i>                             | 57           | 0.0526     | 0.005627 |
| GO:0042733 | 17    | embryonic digit morphogenesis                                           | <i>FZD6, INTU, WDPCP</i>                               | 58           | 0.0517     | 0.005906 |
| GO:0048640 | 6     | negative regulation of developmental growth                             | <i>RYK, STK4, SEMA6B, PLXNA3</i>                       | 114          | 0.0351     | 0.005966 |
| GO:0051480 | 20    | regulation of cytosolic calcium ion concentration                       | <i>HRC, FZD9, TMEM178A</i>                             | 59           | 0.0508     | 0.006194 |
| GO:0003007 | 1     | heart morphogenesis                                                     | <i>COL11A1, DVLI, FZD2, WNT11, FZD1, VANGL2</i>        | 263          | 0.0228     | 0.006651 |
| GO:0008361 | 6     | regulation of cell size                                                 | <i>ATP7A, RYK, SEMA6B, PLXNA3, PLXNA4</i>              | 188          | 0.0266     | 0.006942 |
| GO:0061136 | 15    | regulation of proteasomal protein catabolic process                     | <i>CSNK1E, DVLI, RYBP, NKD2, TMEM259</i>               | 189          | 0.0265     | 0.007095 |
| GO:0021545 | 6     | cranial nerve development                                               | <i>HOXD3, PLXNA3, PLXNA4</i>                           | 64           | 0.0469     | 0.007759 |
| GO:0030198 | 14    | extracellular matrix organization                                       | <i>ATP7A, COL11A1, MATN3, KAZALD1, EGFLAM, COL22A1</i> | 274          | 0.0219     | 0.008057 |
| GO:0021537 | 6     | telencephalon development                                               | <i>RYK, SEMA6B, PLXNA3, FAT4, PLXNA4, CEP120</i>       | 275          | 0.0218     | 0.008195 |
| GO:0043062 | 14    | extracellular structure organization                                    | <i>ATP7A, COL11A1, MATN3, KAZALD1, EGFLAM, COL22A1</i> | 275          | 0.0218     | 0.008195 |
| GO:0032434 | 15    | regulation of proteasomal ubiquitin-dependent protein catabolic process | <i>CSNK1E, DVLI, RYBP, NKD2</i>                        | 125          | 0.0320     | 0.008215 |

| Terms      | Group | Description                                                              | Symbols                                                | Pathway size | Gene ratio | P value  |
|------------|-------|--------------------------------------------------------------------------|--------------------------------------------------------|--------------|------------|----------|
| GO:0045229 | 14    | external encapsulating structure organization                            | <i>ATP7A, COL11A1, MATN3, KAZALD1, EGFLAM, COL22A1</i> | 276          | 0.0217     | 0.008335 |
| GO:0050771 | 6     | negative regulation of axonogenesis                                      | <i>RYK, SEMA6B, PLXNA3</i>                             | 66           | 0.0455     | 0.008444 |
| GO:0003206 | 1     | cardiac chamber morphogenesis                                            | <i>COL11A1, FZD2, WNT11, FZD1</i>                      | 127          | 0.0315     | 0.008676 |
| GO:0043588 | 17    | skin development                                                         | <i>ATP7A, NGFR, STK4, FZD3, FZD6, INTU</i>             | 279          | 0.0215     | 0.008763 |
| GO:1903052 | 15    | positive regulation of proteolysis involved in protein catabolic process | <i>CSNK1E, DVL1, NKD2, TMEM259</i>                     | 131          | 0.0305     | 0.009648 |
| GO:0050922 | 6     | negative regulation of chemotaxis                                        | <i>RYK, SEMA6B, PLXNA3</i>                             | 70           | 0.0429     | 0.009917 |

Pathways were restricted to sizes 10–500 genes and retained at an adjusted  $P < 0.01$ . “Group” indexes correspond to Metascape clusters. Gene ratio denotes input hits divided by pathway size.

**Abbreviations:** Gene ratio, fraction of input genes annotated to a pathway; GO, Gene Ontology; GO BP, Gene Ontology Biological Process; KEGG, Kyoto Encyclopedia of Genes and Genomes; PPI, protein–protein interaction; TB, tumor budding; TNBC, triple-negative breast cancer.

**Table S4.** Pathways enriched from *NGFR/EDIL3* seed-based network diffusion

| Term       | Group ID | Category                | Description                                                     | Symbols                                                                                                                                                                                                                                                                             | Pathway size | Gene ratio | P value  |
|------------|----------|-------------------------|-----------------------------------------------------------------|-------------------------------------------------------------------------------------------------------------------------------------------------------------------------------------------------------------------------------------------------------------------------------------|--------------|------------|----------|
| M153       | 1        | Canonical Pathways      | PID P75 NTR PATHWAY                                             | <i>ARHGDI1A, BAD, MAG, NDN, NGF, NGFR, NTF3, NTF4, OMG, SORT1, SMPD2, ADAM17, RIPK2, MAGED1, ZNF274, PRDM4, NCSTN, BEX3, MAGEH1, APH1A, PSENE1, BEX1, RTN4, RTN4R, APH1B</i>                                                                                                        | 68           | 0.36764706 | 3.20E-38 |
| hsa04151   | 2        | KEGG Pathway            | PI3K-Akt signaling pathway                                      | <i>ANGPT1, ANGPT2, BAD, COL4A1, COL9A1, COL9A2, COL9A3, COMP, EFNA1, EFNA2, EFNA3, EFNA4, EFNA5, EGF, EREG, FGF1, VEGFD, GDNF, ITGA9, ITGAV, ITGB3, ITGB5, NGF, NGFR, NTF3, NTF4, NTRK2, PDGFA, PDGFB, PGF, VEGFB, VEGFC, VTN, FGF23, MAG11, FGF19, FGF21, ANGPT4, PDGFC, PDGFD</i> | 362          | 0.11049724 | 5.04E-38 |
| WP4172     | 2        | WikiPathways            | PI3K Akt signaling                                              | <i>ANGPT1, ANGPT2, BAD, COL4A1, COL9A1, COL9A2, COL9A3, COMP, EFNA1, EFNA2, EFNA3, EFNA4, EFNA5, EGF, FGF1, VEGFD, ITGA9, ITGAV, ITGB3, ITGB5, NGF, NGFR, NTF3, NTF4, NTRK2, PDGFA, PDGFB, PGF, VEGFB, VEGFC, VTN, FGF23, FGF19, FGF21, ANGPT4, PDGFC, PDGFD</i>                    | 340          | 0.10882353 | 6.49E-35 |
| GO:0007169 | 2        | GO Biological Processes | cell surface receptor protein tyrosine kinase signaling pathway | <i>ANGPT1, ANGPT2, COL4A1, EFNA1, EFNA2, EFNA3, EFNA4, EFNA5, EGF, EREG, FGF1, VEGFD, GDNF, GFRA1, GFRA2, HCK, ITGB3, NDN, NGF, NGFR, NTF3, NTF4, NTRK2, NTRK3, PDGFA, PDGFB, PGF, SORT1, ADAM17, VEGFB, VEGFC, FGF23, TRADD, FGF19, SHC2, FGF21, SHC3, PDGFC, PDGFD, SHC4</i>      | 453          | 0.08830022 | 4.04E-34 |
| hsa04014   | 2        | KEGG Pathway            | Ras signaling pathway                                           | <i>ANGPT1, ANGPT2, BAD, EFNA1, EFNA2, EFNA3, EFNA4, EFNA5, EGF, FGF1, VEGFD, NGF, NGFR, NTF3, NTF4, NTRK2, PDGFA, PDGFB, PGF, STK4, VEGFB, VEGFC, FGF23, FGF19, SHC2, FGF21, ANGPT4, SHC3, PDGFC, PDGFD, SHC4</i>                                                                   | 238          | 0.1302521  | 9.17E-32 |

| Term         | Group ID | Category           | Description                            | Symbols                                                                                                                                                                                                                              | Pathway size | Gene ratio | P value  |
|--------------|----------|--------------------|----------------------------------------|--------------------------------------------------------------------------------------------------------------------------------------------------------------------------------------------------------------------------------------|--------------|------------|----------|
| hsa04010     | 2        | KEGG Pathway       | MAPK signaling pathway                 | <i>ANGPT1, ANGPT2, EFNA1, EFNA2, EFNA3, EFNA4, EFNA5, EGF, EREG, FGF1, VEGFD, GDNF, MEF2C, NGF, NGFR, NTF3, NTF4, NTRK2, PDGFA, PDGFB, PGF, STK4, VEGFB, VEGFC, MAP3K12, FGF23, TRADD, FGF19, FGF21, IRAK4, ANGPT4, PDGFC, PDGFD</i> | 300          | 0.11       | 2.58E-31 |
| WP3932       | 2        | WikiPathways       | Focal adhesion PI3K Akt mTOR signaling | <i>ANGPT1, ANGPT2, BAD, COL4A1, COL11A1, COMP, EFNA1, EFNA2, EFNA3, EFNA4, EFNA5, EGF, FGF1, VEGFD, ITGA9, ITGAV, ITGB2, ITGB3, ITGB5, NGF, NGFR, PDGFA, PDGFB, PGF, VEGFB, VEGFC, VTN, FGF19, FGF21, ANGPT4, PDGFC, PDGFD</i>       | 304          | 0.10526316 | 9.24E-30 |
| hsa04722     | 3        | KEGG Pathway       | Neurotrophin signaling pathway         | <i>ARHGDIA, ARHGDIB, ARHGDIG, BAD, IRAK2, NGF, NGFR, NTF3, NTF4, NTRK2, NTRK3, SORT1, RIPK2, MAGED1, ZNF274, PRDM4, IRAK3, SHC2, BEX3, IRAK4, SHC3, KIDINS220, SHC4</i>                                                              | 120          | 0.19166667 | 8.14E-28 |
| hsa04015     | 2        | KEGG Pathway       | Rap1 signaling pathway                 | <i>ANGPT1, ANGPT2, EFNA1, EFNA2, EFNA3, EFNA4, EFNA5, EGF, FGF1, VEGFD, ITGB2, ITGB3, NGF, NGFR, PDGFA, PDGFB, PGF, VEGFB, VEGFC, FGF23, MAG11, FGF19, FGF21, ANGPT4, PDGFC, PDGFD</i>                                               | 212          | 0.12264151 | 4.77E-26 |
| R-HSA-193704 | 1        | Reactome Gene Sets | p75 NTR receptor-mediated signalling   | <i>ARHGDIA, BAD, CASP2, MAG, NGF, OMG, SMPD2, ADAM17, RIPK2, MAGED1, PRDM4, NCSTN, ITGB3BP, BEX3, APH1A, PSENEN, RTN4, RTN4R, APH1B, LINGO1</i>                                                                                      | 94           | 0.21276596 | 2.68E-25 |
| WP5087       | 2        | WikiPathways       | Pleural mesothelioma                   | <i>ANGPT1, ANGPT2, COL4A1, EFNA1, EFNA2, EFNA3, EFNA4, EFNA5, EGF, FGF1, VEGFD, ITGAV, ITGB2, ITGB3, MDK, NGF, NGFR, NTF3, NTF4, NTRK2, PDGFA, PDGFB, PGF, VEGFB, VEGFC, FGF23, FGF19, FGF21, ANGPT4, PDGFC, PDGFD, RASSF4</i>       | 439          | 0.07289294 | 1.01E-24 |

| Term          | Group ID | Category                | Description                         | Symbols                                                                                                                                                                                   | Pathway size | Gene ratio | P value  |
|---------------|----------|-------------------------|-------------------------------------|-------------------------------------------------------------------------------------------------------------------------------------------------------------------------------------------|--------------|------------|----------|
| hsa04510      | 2        | KEGG Pathway            | Focal adhesion                      | <i>BAD, COL4A1, COL9A1, COL9A2, COL9A3, COMP, EGF, VEGFD, ITGA9, ITGAV, ITGB3, ITGB5, PDGFA, PDGFB, PGF, VEGFB, VEGFC, VTN, SHC2, SHC3, PDGFC, PDGFD, SHC4</i>                            | 203          | 0.11330049 | 2.44E-22 |
| R-HSA-73887   | 1        | Reactome Gene Sets      | Death Receptor Signaling            | <i>ARHGDI1, BAD, CASP2, MAG, NGF, OMG, SMPD2, ADAM17, RIPK2, MAGED1, PRDM4, NCSTN, ITGB3BP, BEX3, APH1A, PSENEN, RTN4, RTN4R, APH1B, LINGO1</i>                                           | 132          | 0.15151515 | 3.76E-22 |
| WP306         | 2        | WikiPathways            | Focal adhesion                      | <i>BAD, COL4A1, COMP, EGF, VEGFD, HCK, ITGA9, ITGAV, ITGB3, ITGB5, PDGFA, PDGFB, PGF, VEGFB, VEGFC, VTN, SHC2, SHC3, PDGFC, PDGFD, SHC4</i>                                               | 199          | 0.10552764 | 7.88E-20 |
| M5883         | 2        | Canonical Pathways      | NABA SECRETED FACTORS               | <i>ANGPT1, ANGPT2, CNTF, EGF, EREG, FGF1, VEGFD, GDNF, IL17A, MDK, NGF, NTF3, NTF4, PDGFA, PDGFB, PGF, VEGFB, VEGFC, FGF23, FGF19, FGF21, ANGPT4, PDGFC, PDGFD</i>                        | 343          | 0.06997085 | 2.57E-18 |
| GO:0043410    | 2        | GO Biological Processes | positive regulation of MAPK cascade | <i>ANGPT1, EFNA1, EGF, FGF1, GAS6, ICAM1, ITGB3, MEF2C, NGF, NTF3, NTRK2, NTRK3, PDGFA, PDGFB, VEGFB, MAP3K12, FGF23, RIPK2, TRAF4, FGF19, EDAR, FGF21, TNFRSF19, PDGFC, EDA2R, PDGFD</i> | 474          | 0.05485232 | 3.61E-17 |
| GO:0048514    | 2        | GO Biological Processes | blood vessel morphogenesis          | <i>ANGPT1, ANGPT2, COL4A1, COMP, EFNA1, EGF, EREG, FGF1, VEGFD, RBPJ, ITGAV, ITGB3, MFGE8, NRCAM, NTRK2, PDGFA, PDGFB, PGF, STK4, TGFB3, VEGFB, VEGFC, ANGPT4, RTN4</i>                   | 445          | 0.05393258 | 9.36E-16 |
| R-HSA-3000178 | 5        | Reactome Gene Sets      | ECM proteoglycans                   | <i>COL4A1, COL9A1, COL9A2, COL9A3, COMP, HAPLN1, ITGA9, ITGAV, ITGB3, ITGB5, MATN1, MATN3, VTN</i>                                                                                        | 76           | 0.17105263 | 1.59E-15 |
| GO:0001525    | 2        | GO Biological Processes | angiogenesis                        | <i>ANGPT1, ANGPT2, COL4A1, EFNA1, EGF, EREG, FGF1, VEGFD, RBPJ, ITGAV, ITGB3, MFGE8, NRCAM, PDGFA, PDGFB, PGF, STK4, VEGFB, VEGFC, ANGPT4, RTN4</i>                                       | 352          | 0.05965909 | 8.98E-15 |

| Term          | Group ID | Category                | Description                                                                               | Symbols                                                                                                                                                | Pathway size | Gene ratio | P value  |
|---------------|----------|-------------------------|-------------------------------------------------------------------------------------------|--------------------------------------------------------------------------------------------------------------------------------------------------------|--------------|------------|----------|
| WP2380        | 3        | WikiPathways            | Brain derived neurotrophic factor BDNF signaling                                          | <i>BAD, MEF2C, NGF, NGFR, NTF3, NTRK2, NTRK3, SORT1, ADAM17, RANBP9, SHC2, SHC3, KIDINS220, LINGO1, SHC4</i>                                           | 137          | 0.10948905 | 9.88E-15 |
| R-HSA-1474244 | 5        | Reactome Gene Sets      | Extracellular matrix organization                                                         | <i>COL4A1, COL9A1, COL9A2, COL9A3, COL11A1, COMP, HAPLN1, ICAM1, ITGA9, ITGAV, ITGB2, ITGB3, ITGB5, MATN1, MATN3, PDGFA, PDGFB, ADAM17, VTN, NCSTN</i> | 318          | 0.06289308 | 1.49E-14 |
| hsa04020      | 2        | KEGG Pathway            | Calcium signaling pathway                                                                 | <i>EGF, FGF1, VEGFD, GDNF, HRC, NGF, NTRK2, NTRK3, NTSR1, PDGFA, PDGFB, VEGFB, VEGFC, FGF23, FGF19, FGF21, PDGFC, PDGFD</i>                            | 254          | 0.07086614 | 4.23E-14 |
| GO:0038179    | 3        | GO Biological Processes | neurotrophin signaling pathway                                                            | <i>GFRA1, NDN, NGF, NTF3, NTF4, NTRK2, NTRK3, SORT1, KIDINS220</i>                                                                                     | 28           | 0.32142857 | 7.49E-14 |
| GO:0001934    | 7        | GO Biological Processes | positive regulation of protein phosphorylation                                            | <i>ANGPT1, CNTF, EFNA1, EFNA5, EGF, EREG, FGF1, GAS6, PDGFA, PDGFB, STK4, VEGFB, RIPK2, TRAF4, FGF19, SEMA4D, ANGPT4</i>                               | 231          | 0.07359307 | 1.19E-13 |
| R-HSA-216083  | 5        | Reactome Gene Sets      | Integrin cell surface interactions                                                        | <i>COL4A1, COL9A1, COL9A2, COL9A3, COMP, ICAM1, ITGA9, ITGAV, ITGB2, ITGB3, ITGB5, VTN</i>                                                             | 84           | 0.14285714 | 1.91E-13 |
| GO:0070374    | 2        | GO Biological Processes | positive regulation of ERK1 and ERK2 cascade                                              | <i>ANGPT1, FGF1, GAS6, ICAM1, ITGB3, NGF, PDGFA, PDGFB, VEGFB, MAP3K12, FGF23, RIPK2, FGF19, FGF21, PDGFC, PDGFD</i>                                   | 201          | 0.07960199 | 1.92E-13 |
| GO:0042327    | 7        | GO Biological Processes | positive regulation of phosphorylation                                                    | <i>ANGPT1, CNTF, EFNA1, EFNA5, EGF, EREG, FGF1, GAS6, PDGFA, PDGFB, STK4, VEGFB, RIPK2, TRAF4, FGF19, SEMA4D, ANGPT4</i>                               | 254          | 0.06692913 | 5.60E-13 |
| GO:0051897    | 2        | GO Biological Processes | positive regulation of phosphatidylinositol 3-kinase/protein kinase B signal transduction | <i>ANGPT1, EFNA5, EGF, GAS6, IL17A, NGF, NTF3, NTRK2, NTRK3, PDGFA, PDGFB, VEGFB, SEMA4D, PDGFC, RTN4, PDGFD</i>                                       | 217          | 0.07373272 | 6.27E-13 |

| Term       | Group ID | Category                | Description                                         | Symbols                                                                                                                                                    | Pathway size | Gene ratio | P value  |
|------------|----------|-------------------------|-----------------------------------------------------|------------------------------------------------------------------------------------------------------------------------------------------------------------|--------------|------------|----------|
| GO:0061564 | 4        | GO Biological Processes | axon development                                    | <i>ALCAM, CNP, EFNA1, EFNA2, EFNA3, EFNA4, EFNA5, GDNF, MAG, NDN, NGF, <b>NGFR</b>, NRCAM, NTRK3, ADAM17, SEMA4D, TNFRSF21, PLXNA3, PRDM8, RTN4, RTN4R</i> | 441          | 0.04761905 | 7.18E-13 |
| GO:0070372 | 2        | GO Biological Processes | regulation of ERK1 and ERK2 cascade                 | <i>ANGPT1, CRYBA1, FGF1, GAS6, ICAM1, ITGB3, NGF, PDGFA, PDGFB, VEGFB, MAP3K12, FGF23, RIPK2, FGF19, RANBP9, FGF21, PDGFC, PDGFD</i>                       | 303          | 0.05940594 | 8.61E-13 |
| GO:0006935 | 2        | GO Biological Processes | chemotaxis                                          | <i>ANGPT1, EFNA5, VEGFD, GAS6, GDNF, HOXB9, ITGA9, ITGAV, ITGB2, ITGB3, MDK, NTF3, PDGFA, PDGFB, PGF, VEGFB, VEGFC, SEMA4D, PLXNA3</i>                     | 350          | 0.05428571 | 9.59E-13 |
| GO:0042330 | 2        | GO Biological Processes | taxis                                               | <i>ANGPT1, EFNA5, VEGFD, GAS6, GDNF, HOXB9, ITGA9, ITGAV, ITGB2, ITGB3, MDK, NTF3, PDGFA, PDGFB, PGF, VEGFB, VEGFC, SEMA4D, PLXNA3</i>                     | 352          | 0.05397727 | 1.06E-12 |
| GO:0010562 | 7        | GO Biological Processes | positive regulation of phosphorus metabolic process | <i>ANGPT1, CNTF, EFNA1, EFNA5, EGF, EREG, FGF1, GAS6, NTSR1, PDGFA, PDGFB, STK4, VEGFB, RIPK2, TRAF4, FGF19, SEMA4D, ANGPT4</i>                            | 320          | 0.05625    | 2.16E-12 |
| GO:0045937 | 7        | GO Biological Processes | positive regulation of phosphate metabolic process  | <i>ANGPT1, CNTF, EFNA1, EFNA5, EGF, EREG, FGF1, GAS6, NTSR1, PDGFA, PDGFB, STK4, VEGFB, RIPK2, TRAF4, FGF19, SEMA4D, ANGPT4</i>                            | 320          | 0.05625    | 2.16E-12 |
| GO:0050678 | 8        | GO Biological Processes | regulation of epithelial cell proliferation         | <i>BAD, EGF, EREG, FGF1, RBPJ, IL17A, ITGB3, MDK, MEF2C, <b>NGFR</b>, PDGFB, STK4, ADAM17, TGFBR3, VEGFB, VEGFC, MAGED1, CNMD, ITGB3BP, RTN4</i>           | 416          | 0.04807692 | 2.19E-12 |
| GO:0040011 | 2        | GO Biological Processes | locomotion                                          | <i>ANGPT1, EFNA5, VEGFD, GAS6, GDNF, HOXB9, ITGA9, ITGAV, ITGB2, ITGB3, MDK, NTF3, PDGFA, PDGFB, PGF, VEGFB, VEGFC, SEMA4D, PLXNA3</i>                     | 376          | 0.05053192 | 3.37E-12 |

| Term          | Group ID | Category                | Description                                                                      | Symbols                                                                                                                                                 | Pathway size | Gene ratio | P value  |
|---------------|----------|-------------------------|----------------------------------------------------------------------------------|---------------------------------------------------------------------------------------------------------------------------------------------------------|--------------|------------|----------|
| R-HSA-2219528 | 9        | Reactome Gene Sets      | PI3K/AKT Signaling in Cancer                                                     | <i>BAD, EGF, EREG, FGF1, NTF3, NTF4, NTRK2, NTRK3, PDGFA, PDGFB, FGF23, FGF19</i>                                                                       | 112          | 0.10714286 | 6.41E-12 |
| R-HSA-2219530 | 9        | Reactome Gene Sets      | Constitutive Signaling by Aberrant PI3K in Cancer                                | <i>EGF, EREG, FGF1, NTF3, NTF4, NTRK2, NTRK3, PDGFA, PDGFB, FGF23, FGF19</i>                                                                            | 86           | 0.12790698 | 6.91E-12 |
| R-HSA-6811558 | 9        | Reactome Gene Sets      | PI5P, PP2A and IER3 Regulate PI3K/AKT Signaling                                  | <i>EGF, EREG, FGF1, NTF3, NTF4, NTRK2, NTRK3, PDGFA, PDGFB, FGF23, FGF19, IRAK4</i>                                                                     | 114          | 0.10526316 | 7.93E-12 |
| GO:0051896    | 2        | GO Biological Processes | regulation of phosphatidylinositol 3-kinase/protein kinase B signal transduction | <i>ANGPT1, CRYBA1, EFNA5, EGF, GAS6, IL17A, NGF, NTF3, NTRK2, NTRK3, PDGFA, PDGFB, VEGFB, SEMA4D, PDGFC, RTN4, PDGFD</i>                                | 311          | 0.05466238 | 1.42E-11 |
| R-HSA-199418  | 9        | Reactome Gene Sets      | Negative regulation of the PI3K/AKT network                                      | <i>EGF, EREG, FGF1, NTF3, NTF4, NTRK2, NTRK3, PDGFA, PDGFB, FGF23, FGF19, IRAK4</i>                                                                     | 121          | 0.09917355 | 1.62E-11 |
| GO:0048667    | 4        | GO Biological Processes | cell morphogenesis involved in neuron differentiation                            | <i>ALCAM, CNP, EFNA1, EFNA2, EFNA3, EFNA4, EFNA5, GDNF, MEF2C, NDN, NGF, <b>NGFR</b>, NRCAM, NTRK3, ADAM17, SEMA4D, PLXNA3, PRDM8, KIDINS220, RTN4R</i> | 465          | 0.04301075 | 1.64E-11 |
| M5884         | 10       | Canonical Pathways      | NABA CORE MATRISOME                                                              | <i>COL4A1, COL9A1, COL9A2, COL9A3, COL11A1, COMP, HAPLN1, GAS6, MATN1, MATN3, MFGE8, VTN, CILP, <b>EDIL3</b>, HAPLN3, CILP2</i>                         | 275          | 0.05818182 | 2.29E-11 |
| R-HSA-3928665 | 4        | Reactome Gene Sets      | EPH-ephrin mediated repulsion of cells                                           | <i>EFNA1, EFNA2, EFNA3, EFNA4, EFNA5, NCSTN, APHIA, PSENE1, APHIB</i>                                                                                   | 51           | 0.17647059 | 2.92E-11 |
| GO:0031401    | 7        | GO Biological Processes | positive regulation of protein modification process                              | <i>ANGPT1, CNTF, EFNA1, EFNA5, EGF, EREG, FGF1, GAS6, NGF, PDGFA, PDGFB, STK4, VEGFB, RIPK2, TRAF4, FGF19, SEMA4D, ANGPT4</i>                           | 375          | 0.048      | 2.99E-11 |
| hsa05218      | 9        | KEGG Pathway            | Melanoma                                                                         | <i>BAD, EGF, FGF1, PDGFA, PDGFB, FGF23, FGF19, FGF21, PDGFC, PDGFD</i>                                                                                  | 73           | 0.1369863  | 3.16E-11 |

| Term          | Group ID | Category                | Description                                                                      | Symbols                                                                                                                             | Pathway size | Gene ratio | P value  |
|---------------|----------|-------------------------|----------------------------------------------------------------------------------|-------------------------------------------------------------------------------------------------------------------------------------|--------------|------------|----------|
| R-HSA-204998  | 11       | Reactome Gene Sets      | Cell death signalling via NRAGE, NRIF and NADE                                   | <i>BAD, CASP2, NGF, MAGED1, NCSTN, ITGB3BP, BEX3, APH1A, PSENE1, APH1B</i>                                                          | 73           | 0.1369863  | 3.16E-11 |
| GO:0051781    | 12       | GO Biological Processes | positive regulation of cell division                                             | <i>EREG, FGF1, VEGFD, MDK, PDGFA, PDGFB, PGF, VEGFB, VEGFC, PDGFC, PDGFD</i>                                                        | 99           | 0.11111111 | 3.32E-11 |
| M160          | 5        | Canonical Pathways      | PID AVB3 INTEGRIN PATHWAY                                                        | <i>COL4A1, COL9A1, COL9A2, COL9A3, COL11A1, ITGAV, ITGB3, MFGE8, VTN, EDIL3</i>                                                     | 74           | 0.13513514 | 3.64E-11 |
| GO:0007409    | 4        | GO Biological Processes | axonogenesis                                                                     | <i>ALCAM, CNP, EFNA1, EFNA2, EFNA3, EFNA4, EFNA5, GDNF, NDN, NGF, NGFR, NRCAM, NTRK3, ADAM17, SEMA4D, PLXNA3, PRDM8, RTN4R</i>      | 383          | 0.04699739 | 4.23E-11 |
| GO:0001932    | 7        | GO Biological Processes | regulation of protein phosphorylation                                            | <i>ANGPT1, CNTF, EFNA1, EFNA5, EGF, EREG, FGF1, GAS6, ITGB2, PDGFA, PDGFB, STK4, VEGFB, RIPK2, TRAF4, FGF19, SEMA4D, ANGPT4</i>     | 387          | 0.04651163 | 5.01E-11 |
| R-HSA-5663202 | 9        | Reactome Gene Sets      | Diseases of signal transduction by growth factor receptors and second messengers | <i>BAD, EGF, EREG, FGF1, RBPJ, ITGB3, NTF3, NTF4, NTRK2, NTRK3, PDGFA, PDGFB, ADAM17, FGF23, FGF19, NCSTN, APH1A, PSENE1, APH1B</i> | 452          | 0.0420354  | 8.00E-11 |
| hsa01521      | 13       | KEGG Pathway            | EGFR tyrosine kinase inhibitor resistance                                        | <i>BAD, EGF, GAS6, PDGFA, PDGFB, SHC2, SHC3, PDGFC, PDGFD, SHC4</i>                                                                 | 80           | 0.125      | 8.07E-11 |
| GO:0050920    | 12       | GO Biological Processes | regulation of chemotaxis                                                         | <i>ANGPT2, FGF1, VEGFD, GAS6, MDK, NTF3, NTRK3, PDGFB, PGF, ADAM17, VEGFB, VEGFC, PLXNA3, PDGFD</i>                                 | 214          | 0.06542056 | 9.03E-11 |
| WP4806        | 13       | WikiPathways            | EGFR tyrosine kinase inhibitor resistance                                        | <i>BAD, EGF, GAS6, PDGFA, PDGFB, SHC2, SHC3, PDGFC, PDGFD, SHC4</i>                                                                 | 84           | 0.11904762 | 1.33E-10 |
| GO:0043524    | 15       | GO Biological Processes | negative regulation of neuron apoptotic process                                  | <i>ANGPT1, CNTF, CNTFR, GDNF, MAG, MDK, MEF2C, NGF, NTF3, NTF4, NTRK2, VEGFB, MAP3K12</i>                                           | 181          | 0.0718232  | 1.36E-10 |

| Term          | Group ID | Category                | Description                              | Symbols                                                                                                                         | Pathway size | Gene ratio | P value  |
|---------------|----------|-------------------------|------------------------------------------|---------------------------------------------------------------------------------------------------------------------------------|--------------|------------|----------|
| R-HSA-5673001 | 9        | Reactome Gene Sets      | RAF/MAP kinase cascade                   | <i>ANGPT1, EGF, EREG, FGF1, GDNF, GFRA1, GFRA2, ITGB3, PDGFA, PDGFB, FGF23, FGF19, RANBP9, SHC2, SHC3</i>                       | 266          | 0.05639098 | 1.53E-10 |
| M187          | 3        | Canonical Pathways      | PID TRKR PATHWAY                         | <i>NGF, NGFR, NTF3, NTF4, NTRK2, NTRK3, MAGED1, SHC2, SHC3</i>                                                                  | 61           | 0.14754098 | 1.58E-10 |
| GO:0050926    | 12       | GO Biological Processes | regulation of positive chemotaxis        | <i>ANGPT2, VEGFD, NTF3, NTRK3, PGF, VEGFB, VEGFC</i>                                                                            | 26           | 0.26923077 | 1.98E-10 |
| R-HSA-5684996 | 9        | Reactome Gene Sets      | MAPK1/MAPK3 signaling                    | <i>ANGPT1, EGF, EREG, FGF1, GDNF, GFRA1, GFRA2, ITGB3, PDGFA, PDGFB, FGF23, FGF19, RANBP9, SHC2, SHC3</i>                       | 272          | 0.05514706 | 2.08E-10 |
| hsa04512      | 5        | KEGG Pathway            | ECM-receptor interaction                 | <i>COL4A1, COL9A1, COL9A2, COL9A3, COMP, ITGA9, ITGAV, ITGB3, ITGB5, VTN</i>                                                    | 89           | 0.11235955 | 2.38E-10 |
| hsa04810      | 9        | KEGG Pathway            | Regulation of actin cytoskeleton         | <i>EGF, FGF1, ITGA9, ITGAV, ITGB2, ITGB3, ITGB5, PDGFA, PDGFB, FGF23, FGF19, FGF21, PDGFC, PDGFD</i>                            | 232          | 0.06034483 | 2.62E-10 |
| R-HSA-205043  | 11       | Reactome Gene Sets      | NRIF signals cell death from the nucleus | <i>NGF, NCSTN, ITGB3BP, APH1A, PSENNEN, APH1B</i>                                                                               | 15           | 0.4        | 2.63E-10 |
| GO:0042325    | 7        | GO Biological Processes | regulation of phosphorylation            | <i>ANGPT1, CNTF, EFNA1, EFNA5, EGF, EREG, FGF1, GAS6, ITGB2, PDGFA, PDGFB, STK4, VEGFB, RIPK2, TRAF4, FGF19, SEMA4D, ANGPT4</i> | 431          | 0.04176334 | 2.86E-10 |
| GO:0033627    | 16       | GO Biological Processes | cell adhesion mediated by integrin       | <i>ICAM1, ITGAV, ITGB2, ITGB3, ITGB5, ADAM17, VTN</i>                                                                           | 29           | 0.24137931 | 4.63E-10 |
| WP382         | 9        | WikiPathways            | MAPK signaling                           | <i>EGF, FGF1, MEF2C, NGF, NTF3, NTF4, NTRK2, PDGFA, PDGFB, STK4, MAP3K12, FGF23, FGF19, FGF21</i>                               | 247          | 0.05668016 | 5.96E-10 |
| GO:0009611    | 17       | GO Biological Processes | response to wounding                     | <i>ANGPT1, ANGPT2, CLIC1, COMP, EREG, FGF1, GAS6, IL17A, ITGAV, ITGB3, ITGB5, MAG, MDK, NTRK3, PDGFA, PDGFB, ADAM17, ANGPT4</i> | 461          | 0.03904555 | 8.36E-10 |

| Term          | Group ID | Category                | Description                                            | Symbols                                                                                                   | Pathway size | Gene ratio | P value  |
|---------------|----------|-------------------------|--------------------------------------------------------|-----------------------------------------------------------------------------------------------------------|--------------|------------|----------|
| R-HSA-5683057 | 9        | Reactome Gene Sets      | MAPK family signaling cascades                         | <i>ANGPT1, EGF, EREG, FGF1, GDNF, GFRA1, GFRA2, ITGB3, PDGFA, PDGFB, FGF23, FGF19, RANBP9, SHC2, SHC3</i> | 311          | 0.04823151 | 1.32E-09 |
| GO:0043523    | 15       | GO Biological Processes | regulation of neuron apoptotic process                 | <i>ANGPT1, CASP2, CNTF, CNTFR, GDNF, MAG, MDK, MEF2C, NGF, NTF3, NTF4, NTRK2, VEGFB, MAP3K12</i>          | 264          | 0.0530303  | 1.42E-09 |
| GO:1903034    | 18       | GO Biological Processes | regulation of response to wounding                     | <i>ANGPT1, ANGPT2, CNTF, IL17A, MDK, NTRK3, PDGFA, PDGFB, ADAM17, VEGFB, VTN, RTN4R</i>                   | 179          | 0.06703911 | 1.56E-09 |
| GO:0050918    | 12       | GO Biological Processes | positive chemotaxis                                    | <i>ANGPT1, VEGFD, GDNF, NTF3, PDGFB, PGF, VEGFB, VEGFC</i>                                                | 54           | 0.14814815 | 1.63E-09 |
| GO:0050679    | 8        | GO Biological Processes | positive regulation of epithelial cell proliferation   | <i>BAD, EGF, FGF1, RBPJ, IL17A, ITGB3, MDK, PDGFB, ADAM17, VEGFB, VEGFC, ITGB3BP, RTN4</i>                | 222          | 0.05855856 | 1.68E-09 |
| WP5078        | 12       | WikiPathways            | T cell modulation and desmoplasia in pancreatic cancer | <i>VEGFD, PDGFA, PDGFB, PGF, VEGFB, VEGFC, PDGFC, PDGFD</i>                                               | 55           | 0.14545455 | 1.90E-09 |
| GO:0050921    | 12       | GO Biological Processes | positive regulation of chemotaxis                      | <i>VEGFD, GAS6, MDK, NTF3, NTRK3, PDGFB, PGF, ADAM17, VEGFB, VEGFC, PDGFD</i>                             | 145          | 0.07586207 | 2.08E-09 |
| M100          | 3        | Canonical Pathways      | PID SHP2 PATHWAY                                       | <i>ANGPT1, EGF, NGF, NTF3, NTF4, NTRK2, NTRK3, PDGFB</i>                                                  | 57           | 0.14035088 | 2.55E-09 |
| WP5265        | 3        | WikiPathways            | Neurogenesis regulation in the olfactory epithelium    | <i>IL17A, MEF2C, NGF, NGFR, NTRK2, NTRK3, RTN4, RTN4R</i>                                                 | 57           | 0.14035088 | 2.55E-09 |
| GO:0048146    | 13       | GO Biological Processes | positive regulation of fibroblast proliferation        | <i>EREG, GAS6, ITGB3, NGFR, PDGFA, PDGFB, PDGFC, PDGFD</i>                                                | 57           | 0.14035088 | 2.55E-09 |
| R-HSA-186797  | 5        | Reactome Gene Sets      | Signaling by PDGF                                      | <i>COL4A1, COL9A1, COL9A2, COL9A3, PDGFA, PDGFB, PDGFC, PDGFD</i>                                         | 58           | 0.13793103 | 2.95E-09 |

| Term          | Group ID | Category                | Description                                | Symbols                                                                                                   | Pathway size | Gene ratio | P value  |
|---------------|----------|-------------------------|--------------------------------------------|-----------------------------------------------------------------------------------------------------------|--------------|------------|----------|
| hsa05165      | 5        | KEGG Pathway            | Human papillomavirus infection             | <i>BAD, COL4A1, COL9A1, COL9A2, COL9A3, COMP, EGF, RBPJ, ITGA9, ITGAV, ITGB3, ITGB5, VTN, TRADD, MAG1</i> | 333          | 0.04504505 | 3.35E-09 |
| GO:0002687    | 12       | GO Biological Processes | positive regulation of leukocyte migration | <i>VEGFD, GAS6, ICAM1, ITGB3, MDK, PGF, ADAMI7, VEGFB, VEGFC, RTN4, PDGFD</i>                             | 152          | 0.07236842 | 3.42E-09 |
| GO:0097191    | 19       | GO Biological Processes | extrinsic apoptotic signaling pathway      | <i>BAD, CASP2, ITGAV, NGF, <b>NGFR</b>, SORT1, STK4, TRADD, SIVA1, BEX3</i>                               | 117          | 0.08547009 | 3.58E-09 |
| R-HSA-9839383 | 11       | Reactome Gene Sets      | TGFBR3 PTM regulation                      | <i>TGFBR3, NCSTN, APH1A, PSENEN, APH1B</i>                                                                | 11           | 0.45454546 | 4.05E-09 |
| R-HSA-2682334 | 4        | Reactome Gene Sets      | EPH-Ephrin signaling                       | <i>EFNA1, EFNA2, EFNA3, EFNA4, EFNA5, NCSTN, APH1A, PSENEN, APH1B</i>                                     | 91           | 0.0989011  | 6.06E-09 |
| R-HSA-419037  | 5        | Reactome Gene Sets      | NCAM1 interactions                         | <i>COL4A1, COL9A1, COL9A2, COL9A3, GDNF, GFRA1, GFRA2</i>                                                 | 42           | 0.16666667 | 7.48E-09 |
| GO:0050927    | 12       | GO Biological Processes | positive regulation of positive chemotaxis | <i>VEGFD, NTF3, NTRK3, PGF, VEGFB, VEGFC</i>                                                              | 25           | 0.24       | 8.83E-09 |
| R-HSA-1257604 | 9        | Reactome Gene Sets      | PIP3 activates AKT signaling               | <i>BAD, EGF, EREG, FGF1, NTF3, NTF4, NTRK2, NTRK3, PDGFA, PDGFB, FGF23, FGF19, IRAK4</i>                  | 262          | 0.04961832 | 1.23E-08 |
| R-HSA-166520  | 20       | Reactome Gene Sets      | Signaling by NTRKs                         | <i>MEF2C, NGF, NTF3, NTF4, NTRK2, NTRK3, PCSK6, SHC2, SHC3, KIDINS220</i>                                 | 133          | 0.07518797 | 1.24E-08 |
| GO:0038180    | 3        | GO Biological Processes | nerve growth factor signaling pathway      | <i>NGF, NTF3, NTF4, SORT1, KIDINS220</i>                                                                  | 14           | 0.35714286 | 1.73E-08 |
| GO:0050930    | 12       | GO Biological Processes | induction of positive chemotaxis           | <i>VEGFD, NTF3, PGF, VEGFB, VEGFC</i>                                                                     | 15           | 0.33333333 | 2.58E-08 |
| GO:0007411    | 4        | GO Biological Processes | axon guidance                              | <i>ALCAM, EFNA1, EFNA2, EFNA3, EFNA4, EFNA5, GDNF, <b>NGFR</b>, NRCAM, ADAMI7, SEMA4D, PLXNA3</i>         | 233          | 0.05150215 | 3.02E-08 |

| Term          | Group ID | Category                | Description                                              | Symbols                                                                                     | Pathway size | Gene ratio | P value  |
|---------------|----------|-------------------------|----------------------------------------------------------|---------------------------------------------------------------------------------------------|--------------|------------|----------|
| GO:1990090    | 3        | GO Biological Processes | cellular response to nerve growth factor stimulus        | <i>NGF, NTF3, NTF4, NTRK2, NTRK3, SORT1, KIDINS220</i>                                      | 51           | 0.1372549  | 3.06E-08 |
| GO:0097485    | 4        | GO Biological Processes | neuron projection guidance                               | <i>ALCAM, EFNA1, EFNA2, EFNA3, EFNA4, EFNA5, GDNF, NGFR, NRCAM, ADAM17, SEMA4D, PLXNA3</i>  | 234          | 0.05128205 | 3.16E-08 |
| GO:0051302    | 12       | GO Biological Processes | regulation of cell division                              | <i>EREG, FGF1, VEGFD, MDK, PDGFA, PDGFB, PGF, VEGFB, VEGFC, PDGFC, PDGFD</i>                | 190          | 0.05789474 | 3.50E-08 |
| GO:0050730    | 7        | GO Biological Processes | regulation of peptidyl-tyrosine phosphorylation          | <i>ANGPT1, CNTF, EFNA1, EFNA5, ITGB2, VEGFB, RIPK2, ANGPT4</i>                              | 79           | 0.10126582 | 3.59E-08 |
| GO:0010594    | 8        | GO Biological Processes | regulation of endothelial cell migration                 | <i>ANGPT1, ANGPT2, EFNA1, EGF, FGF1, ITGB3, MEF2C, PDGFB, ADAM17, TGFBR3, VEGFC, ANGPT4</i> | 239          | 0.05020921 | 3.99E-08 |
| GO:0050731    | 7        | GO Biological Processes | positive regulation of peptidyl-tyrosine phosphorylation | <i>ANGPT1, CNTF, EFNA1, EFNA5, VEGFB, RIPK2, ANGPT4</i>                                     | 53           | 0.13207547 | 4.03E-08 |
| R-HSA-1251985 | 11       | Reactome Gene Sets      | Nuclear signaling by ERBB4                               | <i>EREG, ADAM17, NCSTN, APH1A, PSENEN, APH1B</i>                                            | 32           | 0.1875     | 4.36E-08 |
| GO:1990089    | 3        | GO Biological Processes | response to nerve growth factor                          | <i>NGF, NTF3, NTF4, NTRK2, NTRK3, SORT1, KIDINS220</i>                                      | 54           | 0.12962963 | 4.61E-08 |
| GO:0042987    | 11       | GO Biological Processes | amyloid precursor protein catabolic process              | <i>ADAM17, NCSTN, APH1A, PSENEN, APH1B</i>                                                  | 17           | 0.29411765 | 5.27E-08 |
| GO:0007219    | 11       | GO Biological Processes | Notch signaling pathway                                  | <i>HOXD3, RBPJ, IL17A, ADAM17, NCSTN, APH1A, ANGPT4, PSENEN, APH1B</i>                      | 118          | 0.07627119 | 5.99E-08 |
| R-HSA-9006925 | 9        | Reactome Gene Sets      | Intracellular signaling by second messengers             | <i>BAD, EGF, EREG, FGF1, NTF3, NTF4, NTRK2, NTRK3, PDGFA, PDGFB, FGF23, FGF19, IRAK4</i>    | 304          | 0.04276316 | 7.07E-08 |

| Term          | Group ID | Category                | Description                                       | Symbols                                                                                                    | Pathway size | Gene ratio | P value  |
|---------------|----------|-------------------------|---------------------------------------------------|------------------------------------------------------------------------------------------------------------|--------------|------------|----------|
| R-HSA-1236394 | 11       | Reactome Gene Sets      | Signaling by ERBB4                                | <i>EGF, EREG, ADAM17, NCSTN, APH1A, PSENE1, APH1B</i>                                                      | 58           | 0.12068966 | 7.66E-08 |
| R-HSA-1980145 | 11       | Reactome Gene Sets      | Signaling by NOTCH2                               | <i>RBPJ, MDK, NCSTN, APH1A, PSENE1, APH1B</i>                                                              | 35           | 0.17142857 | 7.69E-08 |
| GO:0019221    | 14       | GO Biological Processes | cytokine-mediated signaling pathway               | <i>BAD, CNTF, CNTFR, EREG, HCK, IL17A, IRAK2, PDGFB, TRADD, RIPK2, EDAR, IRAK3, IRAK4, TNFRSF19, EDA2R</i> | 427          | 0.03512881 | 9.00E-08 |
| R-HSA-375165  | 5        | Reactome Gene Sets      | NCAM signaling for neurite out-growth             | <i>COL4A1, COL9A1, COL9A2, COL9A3, GDNF, GFRA1, GFRA2</i>                                                  | 63           | 0.11111111 | 1.37E-07 |
| GO:0048145    | 13       | GO Biological Processes | regulation of fibroblast proliferation            | <i>EREG, GAS6, ITGB3, NGFR, PDGFA, PDGFB, PDGFC, PDGFD</i>                                                 | 94           | 0.08510638 | 1.41E-07 |
| GO:1903035    | 18       | GO Biological Processes | negative regulation of response to wounding       | <i>ANGPT1, ANGPT2, IL17A, MDK, PDGFA, PDGFB, VTN, RTN4R</i>                                                | 97           | 0.08247423 | 1.81E-07 |
| GO:0010595    | 8        | GO Biological Processes | positive regulation of endothelial cell migration | <i>ANGPT1, EGF, FGF1, ITGB3, PDGFB, ADAM17, TGFBR3, VEGFC, ANGPT4</i>                                      | 136          | 0.06617647 | 2.03E-07 |
| M174          | 16       | Canonical Pathways      | PID UPA UPAR PATHWAY                              | <i>ITGAV, ITGB2, ITGB3, ITGB5, VTN, PDGFD</i>                                                              | 42           | 0.14285714 | 2.40E-07 |
| hsa04820      | 5        | KEGG Pathway            | Cytoskeleton in muscle cells                      | <i>COL4A1, COL9A1, COL9A2, COL9A3, COL11A1, COMP, ITGA9, ITGAV, ITGB3, ITGB5, PDLIM1</i>                   | 232          | 0.04741379 | 2.65E-07 |
| GO:0042060    | 17       | GO Biological Processes | wound healing                                     | <i>ANGPT1, ANGPT2, CLIC1, COMP, EREG, FGF1, GAS6, ITGAV, ITGB3, ITGB5, PDGFA, ADAM17, ANGPT4</i>           | 341          | 0.03812317 | 2.65E-07 |
| GO:0002685    | 12       | GO Biological Processes | regulation of leukocyte migration                 | <i>VEGFD, GAS6, ICAM1, ITGB3, MDK, PGF, ADAM17, VEGFB, VEGFC, RTN4, PDGFD</i>                              | 233          | 0.0472103  | 2.76E-07 |

| Term          | Group ID | Category                | Description                                                      | Symbols                                                                   | Pathway size | Gene ratio | P value  |
|---------------|----------|-------------------------|------------------------------------------------------------------|---------------------------------------------------------------------------|--------------|------------|----------|
| GO:0031589    | 16       | GO Biological Processes | cell-substrate adhesion                                          | <i>ANGPT1, EFNA1, GAS6, HOXD3, ITGA9, ITGAV, ITGB2, ITGB3, ITGB5, VTN</i> | 185          | 0.05405405 | 2.81E-07 |
| GO:0050919    | 16       | GO Biological Processes | negative chemotaxis                                              | <i>EFNA5, ITGAV, ITGB3, PDGFA, SEMA4D, PLXNA3</i>                         | 44           | 0.13636364 | 3.19E-07 |
| GO:0008625    | 19       | GO Biological Processes | extrinsic apoptotic signaling pathway via death domain receptors | <i>BAD, NGF, SORT1, STK4, TRADD, BEX3</i>                                 | 45           | 0.13333333 | 3.66E-07 |
| GO:0045766    | 8        | GO Biological Processes | positive regulation of angiogenesis                              | <i>ANGPT2, FGF1, ITGB2, ITGB3, MDK, VEGFB, VEGFC, CLIC3, ANGPT4, RTN4</i> | 191          | 0.05235602 | 3.78E-07 |
| GO:0042982    | 11       | GO Biological Processes | amyloid precursor protein metabolic process                      | <i>ADAM17, NCSTN, APH1A, PSENEN, APH1B</i>                                | 25           | 0.2        | 4.34E-07 |
| R-HSA-2979096 | 11       | Reactome Gene Sets      | NOTCH2 Activation and Transmission of Signal to the Nucleus      | <i>MDK, NCSTN, APH1A, PSENEN, APH1B</i>                                   | 25           | 0.2        | 4.34E-07 |
| R-HSA-9013507 | 11       | Reactome Gene Sets      | NOTCH3 Activation and Transmission of Signal to the Nucleus      | <i>EGF, NCSTN, APH1A, PSENEN, APH1B</i>                                   | 25           | 0.2        | 4.34E-07 |
| GO:1904018    | 8        | GO Biological Processes | positive regulation of vasculature development                   | <i>ANGPT2, FGF1, ITGB2, ITGB3, MDK, VEGFB, VEGFC, CLIC3, ANGPT4, RTN4</i> | 195          | 0.05128205 | 4.57E-07 |
| R-HSA-9013700 | 11       | Reactome Gene Sets      | NOTCH4 Activation and Transmission of Signal to the Nucleus      | <i>NCSTN, APH1A, PSENEN, APH1B</i>                                        | 11           | 0.36363636 | 4.71E-07 |
| M47           | 16       | Canonical Pathways      | PID INTEGRIN CS PATHWAY                                          | <i>ITGA9, ITGAV, ITGB2, ITGB3, ITGB5</i>                                  | 26           | 0.19230769 | 5.35E-07 |

| Term          | Group ID | Category                | Description                                           | Symbols                                                                                       | Pathway size | Gene ratio | P value  |
|---------------|----------|-------------------------|-------------------------------------------------------|-----------------------------------------------------------------------------------------------|--------------|------------|----------|
| WP2848        | 13       | WikiPathways            | Pluripotent stem cell differentiation pathway         | <i>CNTF, EGF, FGF1, NTF4, PDGFA, PDGFB</i>                                                    | 48           | 0.125      | 5.43E-07 |
| GO:0045765    | 8        | GO Biological Processes | regulation of angiogenesis                            | <i>ANGPT2, EFNA1, EFNA3, FGF1, ITGB2, ITGB3, MDK, VEGFB, VEGFC, CLIC3, CNMD, ANGPT4, RTN4</i> | 365          | 0.03561644 | 5.72E-07 |
| R-HSA-9012852 | 11       | Reactome Gene Sets      | Signaling by NOTCH3                                   | <i>EGF, RBPJ, NCSTN, APH1A, PSENE1, APH1B</i>                                                 | 49           | 0.12244898 | 6.16E-07 |
| GO:1900047    | 18       | GO Biological Processes | negative regulation of hemostasis                     | <i>ANGPT1, ANGPT2, COMP, PDGFA, PDGFB, VTN</i>                                                | 49           | 0.12244898 | 6.16E-07 |
| GO:0031293    | 11       | GO Biological Processes | membrane protein intracellular domain proteolysis     | <i>NCSTN, APH1A, PSENE1, APH1B</i>                                                            | 12           | 0.33333333 | 7.04E-07 |
| GO:0043535    | 8        | GO Biological Processes | regulation of blood vessel endothelial cell migration | <i>ANGPT1, ANGPT2, EFNA1, MEF2C, PDGFB, ADAM17, TGFBR3, VEGFC, ANGPT4</i>                     | 159          | 0.05660377 | 7.64E-07 |
| GO:1901342    | 8        | GO Biological Processes | regulation of vasculature development                 | <i>ANGPT2, EFNA1, EFNA3, FGF1, ITGB2, ITGB3, MDK, VEGFB, VEGFC, CLIC3, CNMD, ANGPT4, RTN4</i> | 375          | 0.03466667 | 7.74E-07 |
| GO:0048013    | 4        | GO Biological Processes | ephrin receptor signaling pathway                     | <i>EFNA1, EFNA2, EFNA3, EFNA4, EFNA5, NTRK3</i>                                               | 51           | 0.11764706 | 7.85E-07 |
| WP2431        | 6        | WikiPathways            | Spinal cord injury                                    | <i>COL4A1, GDNF, ICAM1, MAG, NGFR, OMG, RTN4, RTN4R</i>                                       | 120          | 0.06666667 | 9.29E-07 |
| R-HSA-3928663 | 4        | Reactome Gene Sets      | EPHA-mediated growth cone collapse                    | <i>EFNA1, EFNA2, EFNA3, EFNA4, EFNA5</i>                                                      | 29           | 0.17241379 | 9.51E-07 |
| WP61          | 11       | WikiPathways            | Notch signaling                                       | <i>RBPJ, ADAM17, NCSTN, APH1A, PSENE1, APH1B</i>                                              | 54           | 0.11111111 | 1.11E-06 |
| R-HSA-2122948 | 11       | Reactome Gene Sets      | Activated NOTCH1 Transmits Signal to the Nucleus      | <i>ADAM17, NCSTN, APH1A, PSENE1, APH1B</i>                                                    | 31           | 0.16129032 | 1.35E-06 |

| Term          | Group ID | Category                | Description                                              | Symbols                                                    | Pathway size | Gene ratio | P value  |
|---------------|----------|-------------------------|----------------------------------------------------------|------------------------------------------------------------|--------------|------------|----------|
| WP322         | 16       | WikiPathways            | Osteoblast signaling                                     | <i>ITGAV, ITGB3, PDGFB, FGF23</i>                          | 14           | 0.28571429 | 1.41E-06 |
| GO:0014910    | 13       | GO Biological Processes | regulation of smooth muscle cell migration               | <i>ITGB3, MDK, MEF2C, PDGFA, PDGFB, VTN, PDGFD</i>         | 89           | 0.07865169 | 1.49E-06 |
| R-HSA-114608  | 2        | Reactome Gene Sets      | Platelet degranulation                                   | <i>EGF, VEGFD, GAS6, ITGB3, PDGFA, PDGFB, VEGFB, VEGFC</i> | 129          | 0.0620155  | 1.61E-06 |
| R-HSA-2644602 | 11       | Reactome Gene Sets      | Signaling by NOTCH1 PEST Domain Mutants in Cancer        | <i>RBPJ, ADAM17, NCSTN, APH1A, PSENEN, APH1B</i>           | 58           | 0.10344828 | 1.70E-06 |
| R-HSA-2644603 | 11       | Reactome Gene Sets      | Signaling by NOTCH1 in Cancer                            | <i>RBPJ, ADAM17, NCSTN, APH1A, PSENEN, APH1B</i>           | 58           | 0.10344828 | 1.70E-06 |
| R-HSA-2644606 | 11       | Reactome Gene Sets      | Constitutive Signaling by NOTCH1 PEST Domain Mutants     | <i>RBPJ, ADAM17, NCSTN, APH1A, PSENEN, APH1B</i>           | 58           | 0.10344828 | 1.70E-06 |
| R-HSA-2894858 | 11       | Reactome Gene Sets      | Signaling by NOTCH1 HD+PEST Domain Mutants in Cancer     | <i>RBPJ, ADAM17, NCSTN, APH1A, PSENEN, APH1B</i>           | 58           | 0.10344828 | 1.70E-06 |
| R-HSA-2894862 | 11       | Reactome Gene Sets      | Constitutive Signaling by NOTCH1 HD+PEST Domain Mutants  | <i>RBPJ, ADAM17, NCSTN, APH1A, PSENEN, APH1B</i>           | 58           | 0.10344828 | 1.70E-06 |
| R-HSA-76005   | 2        | Reactome Gene Sets      | Response to elevated platelet cytosolic Ca <sup>2+</sup> | <i>EGF, VEGFD, GAS6, ITGB3, PDGFA, PDGFB, VEGFB, VEGFC</i> | 134          | 0.05970149 | 2.14E-06 |
| M177          | 4        | Canonical Pathways      | PID EPHA FWDPATHWAY                                      | <i>EFNA1, EFNA2, EFNA3, EFNA5, HCK</i>                     | 34           | 0.14705882 | 2.17E-06 |

| Term          | Group ID | Category                | Description                                               | Symbols                                                         | Pathway size | Gene ratio | P value  |
|---------------|----------|-------------------------|-----------------------------------------------------------|-----------------------------------------------------------------|--------------|------------|----------|
| WP5406        | 6        | WikiPathways            | 13q12 12 copy number variation                            | <i>MAG, TNFRSF19, RTN4, RTN4R, LINGO1</i>                       | 34           | 0.14705882 | 2.17E-06 |
| GO:0001936    | 8        | GO Biological Processes | regulation of endothelial cell proliferation              | <i>EGF, ITGB3, MDK, MEF2C, NGFR, PDGFB, ADAM17, VEGFB, CNMD</i> | 181          | 0.04972376 | 2.24E-06 |
| R-HSA-202733  | 17       | Reactome Gene Sets      | Cell surface interactions at the vascular wall            | <i>ANGPT1, ANGPT2, GAS6, ITGAV, ITGB2, ITGB3, MAG, ANGPT4</i>   | 135          | 0.05925926 | 2.26E-06 |
| hsa04330      | 11       | KEGG Pathway            | Notch signaling pathway                                   | <i>RBPJ, ADAM17, NCSTN, APH1A, PSENEN, APH1B</i>                | 62           | 0.09677419 | 2.53E-06 |
| GO:0035313    | 16       | GO Biological Processes | wound healing, spreading of epidermal cells               | <i>ITGAV, ITGB3, ITGB5, ADAM17</i>                              | 16           | 0.25       | 2.54E-06 |
| GO:0002690    | 12       | GO Biological Processes | positive regulation of leukocyte chemotaxis               | <i>VEGFD, GAS6, MDK, PGF, ADAM17, VEGFB, VEGFC</i>              | 97           | 0.07216495 | 2.67E-06 |
| GO:0007229    | 16       | GO Biological Processes | integrin-mediated signaling pathway                       | <i>HCK, ITGA9, ITGAV, ITGB2, ITGB3, ITGB5, VTN</i>              | 98           | 0.07142857 | 2.86E-06 |
| R-HSA-1442490 | 5        | Reactome Gene Sets      | Collagen degradation                                      | <i>COL4A1, COL9A1, COL9A2, COL9A3, COL11A1, ADAM17</i>          | 64           | 0.09375    | 3.06E-06 |
| M251          | 11       | Canonical Pathways      | PID SYNDECAN 3 PATHWAY                                    | <i>NCSTN, APH1A, PSENEN, APH1B</i>                              | 17           | 0.23529412 | 3.30E-06 |
| M212          | 16       | Canonical Pathways      | PID INTEGRIN5 PATHWAY                                     | <i>ITGAV, ITGB5, VTN, EDIL3</i>                                 | 17           | 0.23529412 | 3.30E-06 |
| GO:0048008    | 13       | GO Biological Processes | platelet-derived growth factor receptor signaling pathway | <i>ITGB3, PDGFA, PDGFB, PDGFC, PDGFD</i>                        | 37           | 0.13513514 | 3.35E-06 |
| GO:0002040    | 12       | GO Biological Processes | sprouting angiogenesis                                    | <i>ANGPT1, VEGFD, PGF, VEGFB, VEGFC, RTN4</i>                   | 66           | 0.09090909 | 3.66E-06 |

| Term         | Group ID | Category                | Description                                               | Symbols                                                                                | Pathway size | Gene ratio | P value  |
|--------------|----------|-------------------------|-----------------------------------------------------------|----------------------------------------------------------------------------------------|--------------|------------|----------|
| GO:0001666   | 12       | GO Biological Processes | response to hypoxia                                       | <i>ANGPT2, BAD, VEGFD, PGF, ADAM17, TGFBR3, VEGFB, VEGFC, PDLIM1, ANGPT4, RTN4</i>     | 304          | 0.03618421 | 3.72E-06 |
| GO:0031663   | 14       | GO Biological Processes | lipopolysaccharide-mediated signaling pathway             | <i>HCK, IRAK2, RIPK2, IRAK3, IRAK4</i>                                                 | 38           | 0.13157895 | 3.84E-06 |
| M3008        | 10       | Canonical Pathways      | NABA ECM GLYCOPROTEINS                                    | <i>COMP, GAS6, MATN1, MATN3, MFGE8, VTN, CILP, EDIL3, CILP2</i>                        | 196          | 0.04591837 | 4.31E-06 |
| GO:0033619   | 11       | GO Biological Processes | membrane protein proteolysis                              | <i>ADAM17, NCSTN, APH1A, PSENNEN, APH1B</i>                                            | 39           | 0.12820513 | 4.38E-06 |
| hsa05224     | 9        | KEGG Pathway            | Breast cancer                                             | <i>EGF, FGF1, FGF23, FGF19, SHC2, FGF21, SHC3, SHC4</i>                                | 148          | 0.05405405 | 4.49E-06 |
| hsa04072     | 13       | KEGG Pathway            | Phospholipase D signaling pathway                         | <i>EGF, PDGFA, PDGFB, SHC2, SHC3, PDGFC, PDGFD, SHC4</i>                               | 149          | 0.05369128 | 4.72E-06 |
| hsa05226     | 9        | KEGG Pathway            | Gastric cancer                                            | <i>EGF, FGF1, FGF23, FGF19, SHC2, FGF21, SHC3, SHC4</i>                                | 150          | 0.05333333 | 4.96E-06 |
| R-HSA-194138 | 12       | Reactome Gene Sets      | Signaling by VEGF                                         | <i>VEGFD, ITGAV, ITGB3, PGF, VEGFB, VEGFC, SHC2</i>                                    | 108          | 0.06481482 | 5.46E-06 |
| GO:0036293   | 12       | GO Biological Processes | response to decreased oxygen levels                       | <i>ANGPT2, BAD, VEGFD, PGF, ADAM17, TGFBR3, VEGFB, VEGFC, PDLIM1, ANGPT4, RTN4</i>     | 317          | 0.03470032 | 5.54E-06 |
| GO:1900046   | 18       | GO Biological Processes | regulation of hemostasis                                  | <i>ANGPT1, ANGPT2, COMP, PDGFA, PDGFB, VTN</i>                                         | 72           | 0.08333333 | 6.11E-06 |
| GO:0090287   | 8        | GO Biological Processes | regulation of cellular response to growth factor stimulus | <i>ANGPT1, FGF1, RBPJ, ITGB3, NGFR, PCSK6, ADAM17, TGFBR3, VEGFB, VEGFC, VTN, CILP</i> | 385          | 0.03116883 | 6.16E-06 |
| WP4262       | 9        | WikiPathways            | Breast cancer pathway                                     | <i>EGF, FGF1, FGF23, FGF19, SHC2, FGF21, SHC3, SHC4</i>                                | 155          | 0.0516129  | 6.31E-06 |

| Term          | Group ID | Category                | Description                                          | Symbols                                                                     | Pathway size | Gene ratio | P value  |
|---------------|----------|-------------------------|------------------------------------------------------|-----------------------------------------------------------------------------|--------------|------------|----------|
| R-HSA-1980143 | 11       | Reactome Gene Sets      | Signaling by NOTCH1                                  | <i>RBPJ, ADAM17, NCSTN, APH1A, PSENEN, APH1B</i>                            | 74           | 0.08108108 | 7.17E-06 |
| R-HSA-9006936 | 11       | Reactome Gene Sets      | Signaling by TGFB family members                     | <i>ITGAV, ITGB3, ITGB5, TGFBR3, NCSTN, APH1A, PSENEN, APH1B</i>             | 158          | 0.05063291 | 7.27E-06 |
| M3005         | 5        | Canonical Pathways      | NABA COLLAGENS                                       | <i>COL4A1, COL9A1, COL9A2, COL9A3, COL11A1</i>                              | 44           | 0.11363636 | 8.06E-06 |
| R-HSA-8948216 | 5        | Reactome Gene Sets      | Collagen chain trimerization                         | <i>COL4A1, COL9A1, COL9A2, COL9A3, COL11A1</i>                              | 44           | 0.11363636 | 8.06E-06 |
| hsa05214      | 13       | KEGG Pathway            | Glioma                                               | <i>EGF, PDGFA, PDGFB, SHC2, SHC3, SHC4</i>                                  | 76           | 0.07894737 | 8.37E-06 |
| WP268         | 11       | WikiPathways            | Notch signaling                                      | <i>RBPJ, ADAM17, NCSTN, APH1A, APH1B</i>                                    | 45           | 0.11111111 | 9.02E-06 |
| WP3931        | 9        | WikiPathways            | Embryonic stem cell pluripotency pathways            | <i>EGF, FGF1, PDGFA, PDGFB, FGF23, FGF19, FGF21</i>                         | 118          | 0.05932203 | 9.80E-06 |
| GO:0097190    | 19       | GO Biological Processes | apoptotic signaling pathway                          | <i>BAD, CASP2, ITGAV, NGF, NGFR, SORT1, STK4, TRADD, SIVA1, BEX3, EDA2R</i> | 337          | 0.03264095 | 9.84E-06 |
| GO:0038084    | 12       | GO Biological Processes | vascular endothelial growth factor signaling pathway | <i>VEGFD, PGF, VEGFB, VEGFC</i>                                             | 22           | 0.18181818 | 9.90E-06 |
| M198          | 5        | Canonical Pathways      | PID SYNDECAN 1 PATHWAY                               | <i>COL4A1, COL9A1, COL9A2, COL9A3, COL11A1</i>                              | 46           | 0.10869565 | 1.01E-05 |
| M70           | 11       | Canonical Pathways      | PID PS1 PATHWAY                                      | <i>RBPJ, NCSTN, APH1A, PSENEN, APH1B</i>                                    | 46           | 0.10869565 | 1.01E-05 |
| R-HSA-9839373 | 11       | Reactome Gene Sets      | Signaling by TGFBR3                                  | <i>TGFBR3, NCSTN, APH1A, PSENEN, APH1B</i>                                  | 46           | 0.10869565 | 1.01E-05 |
| GO:0044409    | 16       | GO Biological Processes | symbiont entry into host                             | <i>GAS6, ICAMI, ITGAV, ITGB3, ITGB5, MOG, SIVA1</i>                         | 120          | 0.05833333 | 1.09E-05 |

| Term       | Group ID | Category                | Description                                                    | Symbols                                                                            | Pathway size | Gene ratio | P value  |
|------------|----------|-------------------------|----------------------------------------------------------------|------------------------------------------------------------------------------------|--------------|------------|----------|
| GO:0046718 | 16       | GO Biological Processes | symbiont entry into host cell                                  | <i>GAS6, ICAMI, ITGAV, ITGB3, ITGB5, MOG, SIVAI</i>                                | 120          | 0.05833333 | 1.09E-05 |
| GO:0014911 | 13       | GO Biological Processes | positive regulation of smooth muscle cell migration            | <i>ITGB3, MDK, PDGFB, VTN, PDGFD</i>                                               | 47           | 0.10638298 | 1.12E-05 |
| GO:0043536 | 8        | GO Biological Processes | positive regulation of blood vessel endothelial cell migration | <i>ANGPT1, PDGFB, ADAM17, TGFBR3, VEGFC, ANGPT4</i>                                | 80           | 0.075      | 1.13E-05 |
| WP4541     | 16       | WikiPathways            | Hippo Merlin signaling dysregulation                           | <i>ITGA9, ITGAV, ITGB2, ITGB3, ITGB5, NGFR, NTRK2</i>                              | 121          | 0.05785124 | 1.15E-05 |
| GO:0070482 | 12       | GO Biological Processes | response to oxygen levels                                      | <i>ANGPT2, BAD, VEGFD, PGF, ADAM17, TGFBR3, VEGFB, VEGFC, PDLIM1, ANGPT4, RTN4</i> | 344          | 0.03197674 | 1.19E-05 |
| GO:0035987 | 16       | GO Biological Processes | endodermal cell differentiation                                | <i>COL11A1, ITGAV, ITGB2, ITGB5, VTN</i>                                           | 48           | 0.10416667 | 1.25E-05 |
| GO:0030195 | 18       | GO Biological Processes | negative regulation of blood coagulation                       | <i>ANGPT1, ANGPT2, PDGFA, PDGFB, VTN</i>                                           | 48           | 0.10416667 | 1.25E-05 |
| GO:0006509 | 11       | GO Biological Processes | membrane protein ectodomain proteolysis                        | <i>ADAM17, NCSTN, APH1A, PSENEN</i>                                                | 24           | 0.16666667 | 1.42E-05 |
| GO:0050435 | 11       | GO Biological Processes | amyloid-beta metabolic process                                 | <i>NCSTN, APH1A, PSENEN, APH1B</i>                                                 | 24           | 0.16666667 | 1.42E-05 |
| GO:0002688 | 12       | GO Biological Processes | regulation of leukocyte chemotaxis                             | <i>VEGFD, GAS6, MDK, PGF, ADAM17, VEGFB, VEGFC</i>                                 | 126          | 0.05555556 | 1.50E-05 |
| hsa04012   | 20       | KEGG Pathway            | ErbB signaling pathway                                         | <i>BAD, EGF, EREG, SHC2, SHC3, SHC4</i>                                            | 86           | 0.06976744 | 1.71E-05 |

| Term          | Group ID | Category                | Description                                         | Symbols                                                                              | Pathway size | Gene ratio | P value  |
|---------------|----------|-------------------------|-----------------------------------------------------|--------------------------------------------------------------------------------------|--------------|------------|----------|
| hsa04926      | 12       | KEGG Pathway            | Relaxin signaling pathway                           | <i>COL4A1, VEGFD, VEGFB, VEGFC, SHC2, SHC3, SHC4</i>                                 | 130          | 0.05384615 | 1.84E-05 |
| GO:0050819    | 18       | GO Biological Processes | negative regulation of coagulation                  | <i>ANGPT1, ANGPT2, PDGFA, PDGFB, VTN</i>                                             | 52           | 0.09615385 | 1.85E-05 |
| WP673         | 20       | WikiPathways            | ErbB signaling                                      | <i>BAD, EGF, EREG, SHC2, SHC3, SHC4</i>                                              | 90           | 0.06666667 | 2.22E-05 |
| R-HSA-3000170 | 16       | Reactome Gene Sets      | Syndecan interactions                               | <i>ITGAV, ITGB3, ITGB5, VTN</i>                                                      | 27           | 0.14814815 | 2.32E-05 |
| GO:0050878    | 17       | GO Biological Processes | regulation of body fluid levels                     | <i>ANGPT1, ANGPT2, ATP7B, CLIC1, COMP, GAS6, ITGB3, PDGFA, PDGFB, VTN, ANGPT4</i>    | 370          | 0.02972973 | 2.34E-05 |
| GO:0007160    | 16       | GO Biological Processes | cell-matrix adhesion                                | <i>HOXD3, ITGA9, ITGAV, ITGB2, ITGB3, ITGB5, VTN</i>                                 | 137          | 0.05109489 | 2.59E-05 |
| R-HSA-1474228 | 5        | Reactome Gene Sets      | Degradation of the extracellular matrix             | <i>COL4A1, COL9A1, COL9A2, COL9A3, COL11A1, ADAM17, NCSTN</i>                        | 138          | 0.05072464 | 2.71E-05 |
| GO:0001706    | 16       | GO Biological Processes | endoderm formation                                  | <i>COL11A1, ITGAV, ITGB2, ITGB5, VTN</i>                                             | 58           | 0.0862069  | 3.17E-05 |
| R-HSA-449147  | 14       | Reactome Gene Sets      | Signaling by Interleukins                           | <i>CNTF, CNTFR, HCK, ICAM1, IL17A, IRAK2, ITGB2, MEF2C, NDN, RIPK2, IRAK3, IRAK4</i> | 455          | 0.02637363 | 3.22E-05 |
| GO:0021675    | 3        | GO Biological Processes | nerve development                                   | <i>HOXD3, NGF, NGFR, NTF3, NTF4, PLXNA3</i>                                          | 97           | 0.06185567 | 3.40E-05 |
| GO:0043085    | 7        | GO Biological Processes | positive regulation of catalytic activity           | <i>ANGPT1, EREG, FGF1, GAS6, PDGFB, FGF23, TRAF4, SEMA4D, PSENEN, RTN4R</i>          | 318          | 0.03144654 | 3.44E-05 |
| GO:0008543    | 9        | GO Biological Processes | fibroblast growth factor receptor signaling pathway | <i>FGF1, NGFR, FGF23, FGF19, FGF21</i>                                               | 59           | 0.08474576 | 3.44E-05 |

| Term          | Group ID | Category                | Description                                                  | Symbols                                                        | Pathway size | Gene ratio | P value  |
|---------------|----------|-------------------------|--------------------------------------------------------------|----------------------------------------------------------------|--------------|------------|----------|
| M17           | 11       | Canonical Pathways      | PID NOTCH PATHWAY                                            | <i>RBPJ, NCSTN, APH1A, PSENE1, APH1B</i>                       | 59           | 0.08474576 | 3.44E-05 |
| GO:0044319    | 16       | GO Biological Processes | wound healing, spreading of cells                            | <i>ITGAV, ITGB3, ITGB5, ADAM17</i>                             | 30           | 0.13333333 | 3.57E-05 |
| GO:0090505    | 16       | GO Biological Processes | epiboly involved in wound healing                            | <i>ITGAV, ITGB3, ITGB5, ADAM17</i>                             | 30           | 0.13333333 | 3.57E-05 |
| R-HSA-2022090 | 5        | Reactome Gene Sets      | Assembly of collagen fibrils and other multimeric structures | <i>COL4A1, COL9A1, COL9A2, COL9A3, COL11A1</i>                 | 60           | 0.08333333 | 3.74E-05 |
| GO:0072124    | 13       | GO Biological Processes | regulation of glomerular mesangial cell proliferation        | <i>ITGB3, PDGFB, PDGFD</i>                                     | 11           | 0.27272727 | 3.82E-05 |
| GO:0090504    | 16       | GO Biological Processes | epiboly                                                      | <i>ITGAV, ITGB3, ITGB5, ADAM17</i>                             | 31           | 0.12903226 | 4.08E-05 |
| GO:0016485    | 11       | GO Biological Processes | protein processing                                           | <i>CASP2, COMP, PCSK6, ADAM17, NCSTN, APH1A, PSENE1, APH1B</i> | 201          | 0.039801   | 4.13E-05 |
| WP185         | 16       | WikiPathways            | Integrin mediated cell adhesion                              | <i>ITGA9, ITGAV, ITGB2, ITGB3, ITGB5, SHC3</i>                 | 102          | 0.05882353 | 4.51E-05 |
| WP51          | 9        | WikiPathways            | Regulation of actin cytoskeleton                             | <i>EGF, FGF1, PDGFA, PDGFB, FGF23, FGF19, FGF21</i>            | 150          | 0.04666667 | 4.62E-05 |
| hsa05215      | 13       | KEGG Pathway            | Prostate cancer                                              | <i>BAD, EGF, PDGFA, PDGFB, PDGFC, PDGFD</i>                    | 106          | 0.05660377 | 5.60E-05 |
| WP5090        | 16       | WikiPathways            | Complement system in neuronal development and plasticity     | <i>GAS6, ITGAV, ITGB2, ITGB3, MFGE8, VTN</i>                   | 107          | 0.05607477 | 5.90E-05 |

| Term          | Group ID | Category                | Description                                                   | Symbols                                                                | Pathway size | Gene ratio | P value  |
|---------------|----------|-------------------------|---------------------------------------------------------------|------------------------------------------------------------------------|--------------|------------|----------|
| R-HSA-187687  | 20       | Reactome Gene Sets      | Signalling to ERKs                                            | <i>NGF, SHC2, SHC3, KIDINS220</i>                                      | 34           | 0.11764706 | 5.92E-05 |
| GO:0016032    | 16       | GO Biological Processes | viral process                                                 | <i>ATP7B, GAS6, ICAMI, ITGAV, ITGB3, ITGB5, MOG, SIVA1, ST6GALNAC3</i> | 275          | 0.03272727 | 6.28E-05 |
| R-HSA-1650814 | 5        | Reactome Gene Sets      | Collagen biosynthesis and modifying enzymes                   | <i>COL4A1, COL9A1, COL9A2, COL9A3, COL11A1</i>                         | 67           | 0.07462687 | 6.38E-05 |
| GO:2000351    | 16       | GO Biological Processes | regulation of endothelial cell apoptotic process              | <i>ANGPT1, GAS6, ICAMI, ITGB3, NGFR</i>                                | 67           | 0.07462687 | 6.38E-05 |
| GO:0048010    | 12       | GO Biological Processes | vascular endothelial growth factor receptor signaling pathway | <i>VEGFD, PGF, VEGFB, VEGFC</i>                                        | 35           | 0.11428571 | 6.65E-05 |
| GO:0001938    | 8        | GO Biological Processes | positive regulation of endothelial cell proliferation         | <i>EGF, ITGB3, MDK, PDGFB, ADAMI7, VEGFB</i>                           | 110          | 0.05454546 | 6.88E-05 |
| GO:0051701    | 16       | GO Biological Processes | biological process involved in interaction with host          | <i>GAS6, ICAMI, ITGAV, ITGB3, ITGB5, MOG, SIVA1</i>                    | 160          | 0.04375    | 6.95E-05 |
| GO:0097192    | 19       | GO Biological Processes | extrinsic apoptotic signaling pathway in absence of ligand    | <i>BAD, CASP2, ITGAV, NGF</i>                                          | 36           | 0.11111111 | 7.45E-05 |
| WP5561        | 16       | WikiPathways            | Integrative Analysis of Treg Glial Interactions               | <i>CNP, ITGAV, ITGB3, MOG, PDGFA, TGFBR3</i>                           | 112          | 0.05357143 | 7.61E-05 |
| GO:0006909    | 16       | GO Biological Processes | phagocytosis                                                  | <i>CRYBA1, GAS6, HCK, ITGAV, ITGB2, ITGB3, MFGE8</i>                   | 163          | 0.04294479 | 7.81E-05 |
| GO:0030193    | 18       | GO Biological Processes | regulation of blood coagulation                               | <i>ANGPT1, ANGPT2, PDGFA, PDGFB, VTN</i>                               | 70           | 0.07142857 | 7.88E-05 |

| Term          | Group ID | Category                | Description                                               | Symbols                                                    | Pathway size | Gene ratio | P value  |
|---------------|----------|-------------------------|-----------------------------------------------------------|------------------------------------------------------------|--------------|------------|----------|
| GO:0043277    | 16       | GO Biological Processes | apoptotic cell clearance                                  | <i>GAS6, ITGAV, ITGB3, MFGE8</i>                           | 37           | 0.10810811 | 8.31E-05 |
| GO:2000352    | 16       | GO Biological Processes | negative regulation of endothelial cell apoptotic process | <i>ANGPT1, GAS6, ICAM1, ITGB3</i>                          | 37           | 0.10810811 | 8.31E-05 |
| R-HSA-2129379 | 16       | Reactome Gene Sets      | Molecules associated with elastic fibres                  | <i>ITGAV, ITGB3, ITGB5, VTN</i>                            | 37           | 0.10810811 | 8.31E-05 |
| R-HSA-190322  | 9        | Reactome Gene Sets      | FGFR4 ligand binding and activation                       | <i>FGF1, FGF23, FGF19</i>                                  | 14           | 0.21428571 | 8.32E-05 |
| R-HSA-190373  | 9        | Reactome Gene Sets      | FGFR1c ligand binding and activation                      | <i>FGF1, TGFBR3, FGF23</i>                                 | 14           | 0.21428571 | 8.32E-05 |
| R-HSA-187037  | 20       | Reactome Gene Sets      | Signaling by NTRK1 (TRKA)                                 | <i>MEF2C, NGF, NTRK2, SHC2, SHC3, KIDINS220</i>            | 115          | 0.05217391 | 8.81E-05 |
| R-HSA-9013694 | 11       | Reactome Gene Sets      | Signaling by NOTCH4                                       | <i>RBPJ, NCSTN, APH1A, PSENEN, APH1B</i>                   | 72           | 0.06944444 | 9.02E-05 |
| GO:0034113    | 16       | GO Biological Processes | heterotypic cell-cell adhesion                            | <i>ITGAV, ITGB2, ITGB3, NRCAM</i>                          | 38           | 0.10526316 | 9.24E-05 |
| GO:0038034    | 19       | GO Biological Processes | signal transduction in absence of ligand                  | <i>BAD, CASP2, ITGAV, NGF</i>                              | 38           | 0.10526316 | 9.24E-05 |
| GO:0061045    | 18       | GO Biological Processes | negative regulation of wound healing                      | <i>ANGPT1, ANGPT2, PDGFA, PDGFB, VTN</i>                   | 73           | 0.06849315 | 9.63E-05 |
| R-HSA-157118  | 11       | Reactome Gene Sets      | Signaling by NOTCH                                        | <i>EGF, RBPJ, MDK, ADAM17, NCSTN, APH1A, PSENEN, APH1B</i> | 228          | 0.03508772 | 9.98E-05 |

| Term          | Group ID | Category                | Description                                                     | Symbols                                                                         | Pathway size | Gene ratio | P value     |
|---------------|----------|-------------------------|-----------------------------------------------------------------|---------------------------------------------------------------------------------|--------------|------------|-------------|
| WP5285        | 12       | WikiPathways            | Immune infiltration in pancreatic cancer                        | <i>VEGFD, IL17A, VEGFB, VEGFC</i>                                               | 39           | 0.1025641  | 0.000102477 |
| R-HSA-5654228 | 9        | Reactome Gene Sets      | Phospholipase C-mediated cascade; FGFR4                         | <i>FGF1, FGF23, FGF19</i>                                                       | 15           | 0.2        | 0.000103465 |
| GO:1901722    | 13       | GO Biological Processes | regulation of cell proliferation involved in kidney development | <i>ITGB3, PDGFB, PDGFD</i>                                                      | 15           | 0.2        | 0.000103465 |
| GO:0050818    | 18       | GO Biological Processes | regulation of coagulation                                       | <i>ANGPT1, ANGPT2, PDGFA, PDGFB, VTN</i>                                        | 76           | 0.06578947 | 0.000116678 |
| GO:0002755    | 14       | GO Biological Processes | MyD88-dependent toll-like receptor signaling pathway            | <i>IRAK2, IRAK3, IRAK4</i>                                                      | 16           | 0.1875     | 0.000126756 |
| GO:0032102    | 18       | GO Biological Processes | negative regulation of response to external stimulus            | <i>ANGPT1, ANGPT2, HCK, IL17A, MDK, PDGFA, PDGFB, VTN, IRAK3, PLXNA3, RTN4R</i> | 449          | 0.02449889 | 0.000131874 |
| GO:0051216    | 10       | GO Biological Processes | cartilage development                                           | <i>COL11A1, COMP, HOXD3, MATN1, MATN3, MEF2C, CNMD</i>                          | 180          | 0.03888889 | 0.000144962 |
| GO:0001704    | 16       | GO Biological Processes | formation of primary germ layer                                 | <i>COL11A1, ITGAV, ITGB2, ITGB3, ITGB5, VTN</i>                                 | 126          | 0.04761905 | 0.00014573  |
| WP4565        | 3        | WikiPathways            | Neural crest cell migration in cancer                           | <i>NGFR, NTRK2, SORT1, KIDINS220</i>                                            | 43           | 0.09302326 | 0.000150789 |
| GO:0045860    | 7        | GO Biological Processes | positive regulation of protein kinase activity                  | <i>ANGPT1, EREG, FGF1, GAS6, PDGFB, TRAF4</i>                                   | 128          | 0.046875   | 0.000158835 |
| GO:0061448    | 10       | GO Biological Processes | connective tissue development                                   | <i>COL11A1, COMP, HOXD3, MATN1, MATN3, MEF2C, PDGFB, CNMD</i>                   | 245          | 0.03265306 | 0.000163544 |

| Term          | Group ID | Category                | Description                                          | Symbols                                                             | Pathway size | Gene ratio | P value     |
|---------------|----------|-------------------------|------------------------------------------------------|---------------------------------------------------------------------|--------------|------------|-------------|
| R-HSA-1566948 | 16       | Reactome Gene Sets      | Elastic fibre formation                              | <i>ITGAV, ITGB3, ITGB5, VTN</i>                                     | 44           | 0.09090909 | 0.000165061 |
| hsa04360      | 4        | KEGG Pathway            | Axon guidance                                        | <i>EFNA1, EFNA2, EFNA3, EFNA4, EFNA5, SEMA4D, PLXNA3</i>            | 184          | 0.03804348 | 0.000166007 |
| WP4223        | 20       | WikiPathways            | Ras signaling                                        | <i>BAD, NGFR, NTRK2, STK4, SHC2, SHC3, SHC4</i>                     | 185          | 0.03783784 | 0.000171636 |
| WP5493        | 20       | WikiPathways            | Effect of dasatinib on the BCR ABL signaling pathway | <i>MEF2C, SHC2, SHC3, SHC4</i>                                      | 45           | 0.08888889 | 0.000180285 |
| R-HSA-190242  | 9        | Reactome Gene Sets      | FGFR1 ligand binding and activation                  | <i>FGF1, TGFBR3, FGF23</i>                                          | 18           | 0.16666667 | 0.000183008 |
| R-HSA-210993  | 18       | Reactome Gene Sets      | Tie2 Signaling                                       | <i>ANGPT1, ANGPT2, ANGPT4</i>                                       | 18           | 0.16666667 | 0.000183008 |
| hsa05206      | 4        | KEGG Pathway            | MicroRNAs in cancer                                  | <i>EFNA1, EFNA2, EFNA3, EFNA4, EFNA5, ITGB3, PDGFA, PDGFB, SHC4</i> | 318          | 0.02830189 | 0.000188109 |
| GO:0007596    | 17       | GO Biological Processes | blood coagulation                                    | <i>ANGPT1, ANGPT2, CLIC1, COMP, GAS6, ITGB3, ANGPT4</i>             | 191          | 0.03664922 | 0.000208747 |
| GO:0007492    | 16       | GO Biological Processes | endoderm development                                 | <i>COL11A1, ITGAV, ITGB2, ITGB5, VTN</i>                            | 86           | 0.05813954 | 0.000209141 |
| R-HSA-2173789 | 16       | Reactome Gene Sets      | TGF-beta receptor signaling activates SMADs          | <i>ITGAV, ITGB3, ITGB5, TGFBR3</i>                                  | 47           | 0.08510638 | 0.000213731 |
| GO:0019058    | 16       | GO Biological Processes | viral life cycle                                     | <i>GAS6, ICAM1, ITGAV, ITGB3, ITGB5, MOG, SIVA1</i>                 | 193          | 0.03626943 | 0.000222464 |
| GO:0050817    | 17       | GO Biological Processes | coagulation                                          | <i>ANGPT1, ANGPT2, CLIC1, COMP, GAS6, ITGB3, ANGPT4</i>             | 193          | 0.03626943 | 0.000222464 |
| GO:0033674    | 7        | GO Biological Processes | positive regulation of kinase activity               | <i>ANGPT1, EREG, FGF1, GAS6, PDGFB, TRAF4</i>                       | 137          | 0.04379562 | 0.000229795 |

| Term          | Group ID | Category                | Description                                                      | Symbols                                                    | Pathway size | Gene ratio | P value     |
|---------------|----------|-------------------------|------------------------------------------------------------------|------------------------------------------------------------|--------------|------------|-------------|
| R-HSA-1474290 | 5        | Reactome Gene Sets      | Collagen formation                                               | <i>COL4A1, COL9A1, COL9A2, COL9A3, COL11A1</i>             | 89           | 0.05617978 | 0.000245529 |
| GO:0044344    | 9        | GO Biological Processes | cellular response to fibroblast growth factor stimulus           | <i>FGF1, NGFR, FGF23, FGF19, FGF21</i>                     | 89           | 0.05617978 | 0.000245529 |
| GO:0061041    | 18       | GO Biological Processes | regulation of wound healing                                      | <i>ANGPT1, ANGPT2, PDGFA, PDGFB, VEGFB, VTN</i>            | 139          | 0.04316547 | 0.000248509 |
| GO:0007599    | 17       | GO Biological Processes | hemostasis                                                       | <i>ANGPT1, ANGPT2, CLIC1, COMP, GAS6, ITGB3, ANGPT4</i>    | 197          | 0.035533   | 0.00025208  |
| R-HSA-5654719 | 9        | Reactome Gene Sets      | SHC-mediated cascade:FGFR4                                       | <i>FGF1, FGF23, FGF19</i>                                  | 20           | 0.15       | 0.000253329 |
| R-HSA-5654720 | 9        | Reactome Gene Sets      | PI-3K cascade:FGFR4                                              | <i>FGF1, FGF23, FGF19</i>                                  | 20           | 0.15       | 0.000253329 |
| R-HSA-167044  | 20       | Reactome Gene Sets      | Signalling to RAS                                                | <i>NGF, SHC2, SHC3</i>                                     | 20           | 0.15       | 0.000253329 |
| R-HSA-76002   | 2        | Reactome Gene Sets      | Platelet activation, signaling and aggregation                   | <i>EGF, VEGFD, GAS6, ITGB3, PDGFA, PDGFB, VEGFB, VEGFC</i> | 262          | 0.03053435 | 0.000257661 |
| GO:0060348    | 10       | GO Biological Processes | bone development                                                 | <i>COMP, MATN1, MEF2C, PDGFA, RPL13, SEMA4D, PDGFC</i>     | 199          | 0.03517588 | 0.000268034 |
| GO:0035924    | 12       | GO Biological Processes | cellular response to vascular endothelial growth factor stimulus | <i>VEGFD, PGF, VEGFB, VEGFC</i>                            | 50           | 0.08       | 0.000271963 |
| GO:0044403    | 16       | GO Biological Processes | biological process involved in symbiotic interaction             | <i>GAS6, ICAM1, ITGAV, ITGB3, ITGB5, MOG, SIVA1</i>        | 200          | 0.035      | 0.00027631  |

| Term          | Group ID | Category                | Description                                                        | Symbols                                                         | Pathway size | Gene ratio | P value     |
|---------------|----------|-------------------------|--------------------------------------------------------------------|-----------------------------------------------------------------|--------------|------------|-------------|
| hsa05418      | 16       | KEGG Pathway            | Fluid shear stress and atherosclerosis                             | <i>ICAM1, ITGAV, ITGB3, MEF2C, PDGFA, PDGFB</i>                 | 142          | 0.04225352 | 0.000278807 |
| hsa04540      | 13       | KEGG Pathway            | Gap junction                                                       | <i>EGF, PDGFA, PDGFB, PDGFC, PDGFD</i>                          | 92           | 0.05434783 | 0.000286539 |
| M103          | 16       | Canonical Pathways      | PID S1P S1P1 PATHWAY                                               | <i>ITGAV, ITGB3, PDGFB</i>                                      | 21           | 0.14285714 | 0.000294193 |
| R-HSA-445144  | 16       | Reactome Gene Sets      | Signal transduction by L1                                          | <i>ITGA9, ITGAV, ITGB3</i>                                      | 21           | 0.14285714 | 0.000294193 |
| GO:0048511    | 3        | GO Biological Processes | rhythmic process                                                   | <i>CASP2, EREG, MDK, NGF, <b>NGFR</b>, NTRK2, NTRK3, MAGED1</i> | 269          | 0.02973978 | 0.000307509 |
| R-HSA-166016  | 14       | Reactome Gene Sets      | Toll Like Receptor 4 (TLR4) Cascade                                | <i>IRAK2, ITGB2, MEF2C, RIPK2, IRAK3, IRAK4</i>                 | 145          | 0.04137931 | 0.000311932 |
| GO:0002429    | 14       | GO Biological Processes | immune response-activating cell surface receptor signaling pathway | <i>HCK, IRAK2, MEF2C, MOG, RIPK2, SIVA1, TNFRSF21, IRAK4</i>    | 270          | 0.02962963 | 0.000315233 |
| M50           | 13       | Canonical Pathways      | PID PTP1B PATHWAY                                                  | <i>EGF, HCK, ITGB3, PDGFB</i>                                   | 52           | 0.07692308 | 0.000316605 |
| GO:0030198    | 10       | GO Biological Processes | extracellular matrix organization                                  | <i>COL4A1, COL11A1, COMP, GAS6, MATNI, MATN3, VTN, KAZALD1</i>  | 272          | 0.02941177 | 0.000331155 |
| R-HSA-5654712 | 9        | Reactome Gene Sets      | FRS-mediated FGFR4 signaling                                       | <i>FGF1, FGF23, FGF19</i>                                       | 22           | 0.13636364 | 0.000339081 |
| GO:0072012    | 18       | GO Biological Processes | glomerulus vasculature development                                 | <i>ANGPT1, ANGPT2, PDGFB</i>                                    | 22           | 0.13636364 | 0.000339081 |
| GO:0043062    | 10       | GO Biological Processes | extracellular structure organization                               | <i>COL4A1, COL11A1, COMP, GAS6, MATNI, MATN3, VTN, KAZALD1</i>  | 273          | 0.02930403 | 0.000339359 |

| Term          | Group ID | Category                | Description                                                       | Symbols                                                        | Pathway size | Gene ratio | P value     |
|---------------|----------|-------------------------|-------------------------------------------------------------------|----------------------------------------------------------------|--------------|------------|-------------|
| GO:0045229    | 10       | GO Biological Processes | external encapsulating structure organization                     | <i>COL4A1, COL11A1, COMP, GAS6, MATN1, MATN3, VTN, KAZALD1</i> | 275          | 0.02909091 | 0.000356264 |
| GO:0071774    | 9        | GO Biological Processes | response to fibroblast growth factor                              | <i>FGF1, NGFR, FGF23, FGF19, FGF21</i>                         | 97           | 0.05154639 | 0.000366184 |
| R-HSA-2404192 | 9        | Reactome Gene Sets      | Signaling by Type 1 Insulin-like Growth Factor 1 Receptor (IGF1R) | <i>FGF1, FGF23, CILP, FGF19</i>                                | 54           | 0.07407407 | 0.000366266 |
| GO:0002011    | 16       | GO Biological Processes | morphogenesis of an epithelial sheet                              | <i>ITGAV, ITGB3, ITGB5, ADAM17</i>                             | 54           | 0.07407407 | 0.000366266 |
| GO:0048661    | 13       | GO Biological Processes | positive regulation of smooth muscle cell proliferation           | <i>EREG, ITGB3, PDGFB, IRAK4, PDGFD</i>                        | 98           | 0.05102041 | 0.000383936 |
| hsa05231      | 13       | KEGG Pathway            | Choline metabolism in cancer                                      | <i>EGF, PDGFA, PDGFB, PDGFC, PDGFD</i>                         | 99           | 0.05050505 | 0.000402332 |
| hsa04933      | 12       | KEGG Pathway            | AGE-RAGE signaling pathway in diabetic complications              | <i>COL4A1, VEGFD, ICAM1, VEGFB, VEGFC</i>                      | 101          | 0.04950495 | 0.00044111  |
| GO:0010988    | 16       | GO Biological Processes | regulation of low-density lipoprotein particle clearance          | <i>ITGAV, ITGB3, FGF21</i>                                     | 24           | 0.125      | 0.00044157  |
| GO:0061437    | 18       | GO Biological Processes | renal system vasculature development                              | <i>ANGPT1, ANGPT2, PDGFB</i>                                   | 24           | 0.125      | 0.00044157  |
| GO:0061440    | 18       | GO Biological Processes | kidney vasculature development                                    | <i>ANGPT1, ANGPT2, PDGFB</i>                                   | 24           | 0.125      | 0.00044157  |
| hsa04148      | 16       | KEGG Pathway            | Efferocytosis                                                     | <i>GAS6, ITGAV, ITGB3, ITGB5, MFGE8, ADAM17</i>                | 157          | 0.03821656 | 0.00047644  |
| R-HSA-9006115 | 3        | Reactome Gene Sets      | Signaling by NTRK2 (TRKB)                                         | <i>NTF3, NTF4, NTRK2</i>                                       | 25           | 0.12       | 0.000499483 |

| Term          | Group ID | Category                | Description                                                    | Symbols                                        | Pathway size | Gene ratio | P value     |
|---------------|----------|-------------------------|----------------------------------------------------------------|------------------------------------------------|--------------|------------|-------------|
| M118          | 12       | Canonical Pathways      | PID INTEGRIN A9B1 PATHWAY                                      | <i>VEGFD, ITGA9, VEGFC</i>                     | 25           | 0.12       | 0.000499483 |
| hsa04974      | 5        | KEGG Pathway            | Protein digestion and absorption                               | <i>COL4A1, COL9A1, COL9A2, COL9A3, COL11A1</i> | 105          | 0.04761905 | 0.000527047 |
| GO:0070167    | 10       | GO Biological Processes | regulation of biomineral tissue development                    | <i>COMP, GAS6, MATN1, MEF2C, FGF23</i>         | 105          | 0.04761905 | 0.000527047 |
| GO:0051347    | 7        | GO Biological Processes | positive regulation of transferase activity                    | <i>ANGPT1, EREG, FGF1, GAS6, PDGFB, TRAF4</i>  | 161          | 0.03726708 | 0.000544136 |
| M226          | 12       | Canonical Pathways      | PID VEGFR1 PATHWAY                                             | <i>PGF, VEGFB, SHC2</i>                        | 26           | 0.11538462 | 0.000562044 |
| GO:0036120    | 13       | GO Biological Processes | cellular response to platelet-derived growth factor stimulus   | <i>ITGB3, PDGFB, PDGFD</i>                     | 26           | 0.11538462 | 0.000562044 |
| GO:0032835    | 18       | GO Biological Processes | glomerulus development                                         | <i>ANGPT1, ANGPT2, MEF2C, PDGFB</i>            | 61           | 0.06557377 | 0.000584174 |
| WP5366        | 6        | WikiPathways            | NF1 copy number variation syndrome                             | <i>EGF, NGF, NGFR, OMG, RTN4R</i>              | 109          | 0.04587156 | 0.000624996 |
| R-HSA-977225  | 11       | Reactome Gene Sets      | Amyloid fiber formation                                        | <i>MFGE8, NCSTN, APH1A, PSENEN, APH1B</i>      | 109          | 0.04587156 | 0.000624996 |
| GO:0043124    | 14       | GO Biological Processes | negative regulation of canonical NF-kappaB signal transduction | <i>IRAK2, TGFBR3, RIPK2, SIVA1, IRAK3</i>      | 109          | 0.04587156 | 0.000624996 |
| R-HSA-5654716 | 9        | Reactome Gene Sets      | Downstream signaling of activated FGFR4                        | <i>FGF1, FGF23, FGF19</i>                      | 27           | 0.11111111 | 0.000629401 |

| Term         | Group ID | Category                | Description                                                        | Symbols                                                      | Pathway size | Gene ratio | P value     |
|--------------|----------|-------------------------|--------------------------------------------------------------------|--------------------------------------------------------------|--------------|------------|-------------|
| WP3624       | 13       | WikiPathways            | Lung fibrosis                                                      | <i>EGF, FGF1, PDGFA, PDGFB</i>                               | 63           | 0.06349206 | 0.000660355 |
| GO:0070555   | 14       | GO Biological Processes | response to interleukin-1                                          | <i>IL17A, IRAK2, RIPK2, IRAK3, IRAK4</i>                     | 111          | 0.04504505 | 0.000678797 |
| R-HSA-166058 | 14       | Reactome Gene Sets      | MyD88:MAL(TIRAP) cascade initiated on plasma membrane              | <i>IRAK2, MEF2C, RIPK2, IRAK3, IRAK4</i>                     | 111          | 0.04504505 | 0.000678797 |
| R-HSA-168188 | 14       | Reactome Gene Sets      | Toll Like Receptor TLR6:TLR2 Cascade                               | <i>IRAK2, MEF2C, RIPK2, IRAK3, IRAK4</i>                     | 111          | 0.04504505 | 0.000678797 |
| GO:0036119   | 13       | GO Biological Processes | response to platelet-derived growth factor                         | <i>ITGB3, PDGFB, PDGFD</i>                                   | 28           | 0.10714286 | 0.000701699 |
| GO:0070498   | 14       | GO Biological Processes | interleukin-1-mediated signaling pathway                           | <i>IRAK2, IRAK3, IRAK4</i>                                   | 28           | 0.10714286 | 0.000701699 |
| GO:0002768   | 14       | GO Biological Processes | immune response-regulating cell surface receptor signaling pathway | <i>HCK, IRAK2, MEF2C, MOG, RIPK2, SIVAI, TNFRSF21, IRAK4</i> | 305          | 0.02622951 | 0.000703622 |
| R-HSA-168898 | 14       | Reactome Gene Sets      | Toll-like Receptor Cascades                                        | <i>IRAK2, ITGB2, MEF2C, RIPK2, IRAK3, IRAK4</i>              | 170          | 0.03529412 | 0.000723761 |
| R-HSA-168179 | 14       | Reactome Gene Sets      | Toll Like Receptor TLR1:TLR2 Cascade                               | <i>IRAK2, MEF2C, RIPK2, IRAK3, IRAK4</i>                     | 114          | 0.04385965 | 0.000765901 |
| R-HSA-181438 | 14       | Reactome Gene Sets      | Toll Like Receptor 2 (TLR2) Cascade                                | <i>IRAK2, MEF2C, RIPK2, IRAK3, IRAK4</i>                     | 114          | 0.04385965 | 0.000765901 |
| GO:0048660   | 13       | GO Biological Processes | regulation of smooth muscle cell proliferation                     | <i>EREG, ITGB3, MEF2C, PDGFB, IRAK4, PDGFD</i>               | 172          | 0.03488372 | 0.000769266 |

| Term          | Group ID | Category                | Description                                  | Symbols                                                                | Pathway size | Gene ratio | P value     |
|---------------|----------|-------------------------|----------------------------------------------|------------------------------------------------------------------------|--------------|------------|-------------|
| GO:0002063    | 10       | GO Biological Processes | chondrocyte development                      | <i>COL11A1, COMP, MATN1</i>                                            | 29           | 0.10344828 | 0.00077908  |
| M55           | 16       | Canonical Pathways      | PID S1P S1P3 PATHWAY                         | <i>ITGAV, ITGB3, PDGFB</i>                                             | 29           | 0.10344828 | 0.00077908  |
| M72           | 16       | Canonical Pathways      | PID NECTIN PATHWAY                           | <i>ITGAV, ITGB3, PDGFB</i>                                             | 30           | 0.1        | 0.00086168  |
| GO:0050820    | 18       | GO Biological Processes | positive regulation of coagulation           | <i>ANGPT1, ANGPT2, VTN</i>                                             | 30           | 0.1        | 0.00086168  |
| GO:0007369    | 16       | GO Biological Processes | gastrulation                                 | <i>COL11A1, ITGAV, ITGB2, ITGB3, ITGB5, VTN</i>                        | 176          | 0.03409091 | 0.000866885 |
| WP3303        | 18       | WikiPathways            | RAC1 PAK1 p38 MMP2 pathway                   | <i>ANGPT1, ANGPT2, BAD, ANGPT4</i>                                     | 68           | 0.05882353 | 0.000881191 |
| hsa04668      | 12       | KEGG Pathway            | TNF signaling pathway                        | <i>VEGFD, ICAM1, ADAM17, VEGFC, TRADD</i>                              | 119          | 0.04201681 | 0.000929268 |
| R-HSA-5654733 | 9        | Reactome Gene Sets      | Negative regulation of FGFR4 signaling       | <i>FGF1, FGF23, FGF19</i>                                              | 31           | 0.09677419 | 0.000949635 |
| hsa05152      | 14       | KEGG Pathway            | Tuberculosis                                 | <i>BAD, IRAK2, ITGB2, TRADD, RIPK2, IRAK4</i>                          | 182          | 0.03296703 | 0.001030901 |
| R-HSA-448424  | 14       | Reactome Gene Sets      | Interleukin-17 signaling                     | <i>IL17A, IRAK2, MEF2C, RIPK2</i>                                      | 71           | 0.05633803 | 0.001036161 |
| hsa04917      | 20       | KEGG Pathway            | Prolactin signaling pathway                  | <i>CYP17A1, SHC2, SHC3, SHC4</i>                                       | 71           | 0.05633803 | 0.001036161 |
| GO:0007162    | 18       | GO Biological Processes | negative regulation of cell adhesion         | <i>ANGPT1, ANGPT2, ARHGDIG, EFNA5, MDK, SEMA4D, TNFRSF21, B4GALNT2</i> | 326          | 0.02453988 | 0.001079812 |
| GO:0002757    | 14       | GO Biological Processes | immune response-activating signaling pathway | <i>HCK, IRAK2, MEF2C, MOG, RIPK2, SIVA1, IRAK3, TNFRSF21, IRAK4</i>    | 407          | 0.02211302 | 0.001108367 |

| Term         | Group ID | Category                | Description                                     | Symbols                                                         | Pathway size | Gene ratio | P value     |
|--------------|----------|-------------------------|-------------------------------------------------|-----------------------------------------------------------------|--------------|------------|-------------|
| GO:0042490   | 3        | GO Biological Processes | mechanoreceptor differentiation                 | <i>RBPJ, NTF4, NTRK2, NTRK3</i>                                 | 75           | 0.05333333 | 0.001271291 |
| WP2118       | 16       | WikiPathways            | Arrhythmogenic right ventricular cardiomyopathy | <i>ITGA9, ITGAV, ITGB3, ITGB5</i>                               | 75           | 0.05333333 | 0.001271291 |
| M186         | 16       | Canonical Pathways      | PID PDGFRB PATHWAY                              | <i>ARHGDI1, HCK, ITGAV, ITGB3, PDGFRB</i>                       | 129          | 0.03875969 | 0.001332008 |
| WP4217       | 16       | WikiPathways            | Ebola virus infection in host                   | <i>GAS6, ITGAV, ITGB3, MFGE8, ADAM17</i>                        | 129          | 0.03875969 | 0.001332008 |
| hsa05220     | 20       | KEGG Pathway            | Chronic myeloid leukemia                        | <i>BAD, SHC2, SHC3, SHC4</i>                                    | 77           | 0.05194805 | 0.001401808 |
| WP5124       | 11       | WikiPathways            | Alzheimer 39 s disease                          | <i>BAD, ADAM17, NCSTN, APH1A, PSENEN, RTN4, APH1B</i>           | 264          | 0.02651515 | 0.001419196 |
| R-HSA-168638 | 14       | Reactome Gene Sets      | NOD1/2 Signaling Pathway                        | <i>CASP2, IRAK2, RIPK2</i>                                      | 36           | 0.08333333 | 0.001474247 |
| GO:0050830   | 14       | GO Biological Processes | defense response to Gram-positive bacterium     | <i>FAU, HCK, IL17A, ADAM17, RIPK2</i>                           | 132          | 0.03787879 | 0.001474663 |
| hsa04650     | 20       | KEGG Pathway            | Natural killer cell mediated cytotoxicity       | <i>ICAM1, ITGB2, SHC2, SHC3, SHC4</i>                           | 134          | 0.03731343 | 0.001575817 |
| WP2059       | 11       | WikiPathways            | Alzheimer 39 s disease and miRNA effects        | <i>BAD, ADAM17, NCSTN, APH1A, PSENEN, RTN4, APH1B</i>           | 269          | 0.02602231 | 0.001579299 |
| WP3888       | 16       | WikiPathways            | VEGFA VEGFR2 signaling                          | <i>CLIC1, CNP, ICAM1, ITGAV, ITGB3, ITGB5, MEF2C, PGF, SHC2</i> | 432          | 0.02083333 | 0.001669063 |
| GO:0010984   | 16       | GO Biological Processes | regulation of lipoprotein particle clearance    | <i>ITGAV, ITGB3, FGF21</i>                                      | 38           | 0.07894737 | 0.001725959 |

| Term          | Group ID | Category                | Description                                     | Symbols                                       | Pathway size | Gene ratio | P value     |
|---------------|----------|-------------------------|-------------------------------------------------|-----------------------------------------------|--------------|------------|-------------|
| GO:0030500    | 10       | GO Biological Processes | regulation of bone mineralization               | <i>COMP, MATN1, MEF2C, FGF23</i>              | 83           | 0.04819277 | 0.001849064 |
| GO:0071347    | 14       | GO Biological Processes | cellular response to interleukin-1              | <i>IL17A, IRAK2, IRAK3, IRAK4</i>             | 83           | 0.04819277 | 0.001849064 |
| hsa04915      | 20       | KEGG Pathway            | Estrogen signaling pathway                      | <i>KRT13, KRT15, SHC2, SHC3, SHC4</i>         | 139          | 0.03597122 | 0.001850944 |
| GO:0032147    | 7        | GO Biological Processes | activation of protein kinase activity           | <i>ANGPT1, FGF1, GAS6</i>                     | 39           | 0.07692308 | 0.00186125  |
| GO:0007623    | 3        | GO Biological Processes | circadian rhythm                                | <i>NGF, NGFR, NTRK2, NTRK3, MAGED1</i>        | 140          | 0.03571429 | 0.001909931 |
| GO:0002062    | 10       | GO Biological Processes | chondrocyte differentiation                     | <i>COL11A1, COMP, MATN1, MEF2C</i>            | 85           | 0.04705882 | 0.002017792 |
| GO:0071222    | 14       | GO Biological Processes | cellular response to lipopolysaccharide         | <i>HCK, IRAK2, MEF2C, RIPK2, IRAK3, IRAK4</i> | 209          | 0.02870813 | 0.002081818 |
| hsa05412      | 16       | KEGG Pathway            | Arrhythmogenic right ventricular cardiomyopathy | <i>ITGA9, ITGAV, ITGB3, ITGB5</i>             | 86           | 0.04651163 | 0.002106019 |
| R-HSA-5654743 | 9        | Reactome Gene Sets      | Signaling by FGFR4                              | <i>FGF1, FGF23, FGF19</i>                     | 41           | 0.07317073 | 0.00215124  |
| GO:0007422    | 3        | GO Biological Processes | peripheral nervous system development           | <i>GDNF, NGF, NTRK2, NTRK3</i>                | 87           | 0.04597701 | 0.002196874 |
| R-HSA-190236  | 9        | Reactome Gene Sets      | Signaling by FGFR                               | <i>FGF1, TGFBR3, FGF23, FGF19</i>             | 89           | 0.04494382 | 0.002386626 |
| GO:0034142    | 14       | GO Biological Processes | toll-like receptor 4 signaling pathway          | <i>IRAK2, RIPK2, IRAK4</i>                    | 43           | 0.06976744 | 0.0024678   |

| Term         | Group ID | Category                | Description                                                             | Symbols                                                             | Pathway size | Gene ratio | P value     |
|--------------|----------|-------------------------|-------------------------------------------------------------------------|---------------------------------------------------------------------|--------------|------------|-------------|
| R-HSA-109704 | 9        | Reactome Gene Sets      | PI3K Cascade                                                            | <i>FGF1, FGF23, FGF19</i>                                           | 44           | 0.06818182 | 0.002636293 |
| GO:0038061   | 14       | GO Biological Processes | non-canonical NF-kappaB signal transduction                             | <i>IRAK2, TRADD, IRAK4</i>                                          | 44           | 0.06818182 | 0.002636293 |
| WP4136       | 14       | WikiPathways            | Fibrin complement receptor 3 signaling                                  | <i>IRAK2, ITGB2, IRAK4</i>                                          | 44           | 0.06818182 | 0.002636293 |
| WP4746       | 16       | WikiPathways            | Thyroid hormones production and peripheral downstream signaling effects | <i>BAD, ITGAV, ITGB3, FGF21</i>                                     | 93           | 0.04301075 | 0.002799387 |
| R-HSA-170834 | 16       | Reactome Gene Sets      | Signaling by TGF-beta Receptor Complex                                  | <i>ITGAV, ITGB3, ITGB5, TGFBR3</i>                                  | 94           | 0.04255319 | 0.002909732 |
| GO:0002253   | 14       | GO Biological Processes | activation of immune response                                           | <i>HCK, IRAK2, MEF2C, MOG, RIPK2, SIVA1, IRAK3, TNFRSF21, IRAK4</i> | 471          | 0.01910828 | 0.002977431 |
| GO:0002764   | 14       | GO Biological Processes | immune response-regulating signaling pathway                            | <i>HCK, IRAK2, MEF2C, MOG, RIPK2, SIVA1, IRAK3, TNFRSF21, IRAK4</i> | 471          | 0.01910828 | 0.002977431 |
| GO:0140895   | 14       | GO Biological Processes | cell surface toll-like receptor signaling pathway                       | <i>IRAK2, RIPK2, IRAK4</i>                                          | 46           | 0.06521739 | 0.00299418  |
| GO:0034446   | 16       | GO Biological Processes | substrate adhesion-dependent cell spreading                             | <i>EFNA1, ITGAV, ITGB3</i>                                          | 46           | 0.06521739 | 0.00299418  |
| R-HSA-168142 | 14       | Reactome Gene Sets      | Toll Like Receptor 10 (TLR10) Cascade                                   | <i>IRAK2, MEF2C, RIPK2, IRAK4</i>                                   | 95           | 0.04210526 | 0.003023015 |

| Term         | Group ID | Category                | Description                                                                   | Symbols                                                   | Pathway size | Gene ratio | P value     |
|--------------|----------|-------------------------|-------------------------------------------------------------------------------|-----------------------------------------------------------|--------------|------------|-------------|
| R-HSA-168176 | 14       | Reactome Gene Sets      | Toll Like Receptor 5 (TLR5) Cascade                                           | <i>IRAK2, MEF2C, RIPK2, IRAK4</i>                         | 95           | 0.04210526 | 0.003023015 |
| R-HSA-975871 | 14       | Reactome Gene Sets      | MyD88 cascade initiated on plasma membrane                                    | <i>IRAK2, MEF2C, RIPK2, IRAK4</i>                         | 95           | 0.04210526 | 0.003023015 |
| GO:0071219   | 14       | GO Biological Processes | cellular response to molecule of bacterial origin                             | <i>HCK, IRAK2, MEF2C, RIPK2, IRAK3, IRAK4</i>             | 227          | 0.02643172 | 0.003135985 |
| GO:0045840   | 13       | GO Biological Processes | positive regulation of mitotic nuclear division                               | <i>EGF, EREG, PDGFB</i>                                   | 47           | 0.06382979 | 0.003183756 |
| WP4534       | 16       | WikiPathways            | Mechanoregulation and pathology of YAP TAZ via Hippo and non Hippo mechanisms | <i>ITGB2, ITGB3, ITGB5</i>                                | 47           | 0.06382979 | 0.003183756 |
| hsa04145     | 16       | KEGG Pathway            | Phagosome                                                                     | <i>COMP, ITGAV, ITGB2, ITGB3, ITGB5</i>                   | 159          | 0.03144654 | 0.003311138 |
| GO:0002833   | 14       | GO Biological Processes | positive regulation of response to biotic stimulus                            | <i>EREG, HCK, IL17A, IRAK2, RIPK2, IRAK3, IRAK4, RTN4</i> | 391          | 0.02046036 | 0.003336783 |
| R-HSA-112399 | 9        | Reactome Gene Sets      | IRS-mediated signalling                                                       | <i>FGF1, FGF23, FGF19</i>                                 | 48           | 0.0625     | 0.003380538 |
| GO:0070527   | 17       | GO Biological Processes | platelet aggregation                                                          | <i>CLIC1, COMP, ITGB3</i>                                 | 48           | 0.0625     | 0.003380538 |
| hsa05410     | 16       | KEGG Pathway            | Hypertrophic cardiomyopathy                                                   | <i>ITGA9, ITGAV, ITGB3, ITGB5</i>                         | 99           | 0.04040404 | 0.003506283 |
| hsa01522     | 20       | KEGG Pathway            | Endocrine resistance                                                          | <i>BAD, SHC2, SHC3, SHC4</i>                              | 99           | 0.04040404 | 0.003506283 |
| M92          | 18       | Canonical Pathways      | PID ANGIOPOIETIN RECEPTOR PATHWAY                                             | <i>ANGPT1, ANGPT2, ANGPT4</i>                             | 49           | 0.06122449 | 0.00358461  |

| Term          | Group ID | Category                | Description                                                                  | Symbols                                       | Pathway size | Gene ratio | P value     |
|---------------|----------|-------------------------|------------------------------------------------------------------------------|-----------------------------------------------|--------------|------------|-------------|
| GO:0045859    | 7        | GO Biological Processes | regulation of protein kinase activity                                        | <i>ANGPT1, EREG, FGF1, GAS6, PDGFB, TRAF4</i> | 234          | 0.02564103 | 0.003638368 |
| R-HSA-9020702 | 14       | Reactome Gene Sets      | Interleukin-1 signaling                                                      | <i>IRAK2, RIPK2, IRAK3, IRAK4</i>             | 101          | 0.03960396 | 0.003766519 |
| R-HSA-975138  | 14       | Reactome Gene Sets      | TRAF6 mediated induction of NFkB and MAP kinases upon TLR7/8 or 9 activation | <i>IRAK2, MEF2C, RIPK2, IRAK4</i>             | 101          | 0.03960396 | 0.003766519 |
| GO:0002224    | 14       | GO Biological Processes | toll-like receptor signaling pathway                                         | <i>IRAK2, IRAK3, IRAK4</i>                    | 50           | 0.06       | 0.003796056 |
| R-HSA-975155  | 14       | Reactome Gene Sets      | MyD88 dependent cascade initiated on endosome                                | <i>IRAK2, MEF2C, RIPK2, IRAK4</i>             | 102          | 0.03921569 | 0.003901417 |
| GO:0050851    | 14       | GO Biological Processes | antigen receptor-mediated signaling pathway                                  | <i>MEF2C, MOG, RIPK2, SIVA1, TNFRSF21</i>     | 166          | 0.03012048 | 0.003977105 |
| hsa04630      | 13       | KEGG Pathway            | JAK-STAT signaling pathway                                                   | <i>CNTF, CNTFR, EGF, PDGFA, PDGFB</i>         | 168          | 0.02976191 | 0.00418377  |
| R-HSA-2428928 | 9        | Reactome Gene Sets      | IRS-related events triggered by IGF1R                                        | <i>FGF1, FGF23, FGF19</i>                     | 52           | 0.05769231 | 0.004241384 |
| R-HSA-5654736 | 9        | Reactome Gene Sets      | Signaling by FGFR1                                                           | <i>FGF1, TGFBR3, FGF23</i>                    | 52           | 0.05769231 | 0.004241384 |
| GO:0032369    | 16       | GO Biological Processes | negative regulation of lipid transport                                       | <i>EGF, ITGAV, ITGB3</i>                      | 52           | 0.05769231 | 0.004241384 |
| hsa05414      | 16       | KEGG Pathway            | Dilated cardiomyopathy                                                       | <i>ITGA9, ITGAV, ITGB3, ITGB5</i>             | 105          | 0.03809524 | 0.004325662 |

| Term          | Group ID | Category                | Description                                                                                 | Symbols                                               | Pathway size | Gene ratio | P value     |
|---------------|----------|-------------------------|---------------------------------------------------------------------------------------------|-------------------------------------------------------|--------------|------------|-------------|
| R-HSA-168181  | 14       | Reactome Gene Sets      | Toll Like Receptor 7/8 (TLR7/8) Cascade                                                     | <i>IRAK2, MEF2C, RIPK2, IRAK4</i>                     | 106          | 0.03773585 | 0.004473712 |
| R-HSA-2428924 | 9        | Reactome Gene Sets      | IGF1R signaling cascade                                                                     | <i>FGF1, FGF23, FGF19</i>                             | 53           | 0.05660377 | 0.00447542  |
| R-HSA-74751   | 9        | Reactome Gene Sets      | Insulin receptor signalling cascade                                                         | <i>FGF1, FGF23, FGF19</i>                             | 54           | 0.05555556 | 0.004717135 |
| WP195         | 14       | WikiPathways            | IL1 signaling                                                                               | <i>IRAK2, IRAK3, IRAK4</i>                            | 54           | 0.05555556 | 0.004717135 |
| R-HSA-168138  | 14       | Reactome Gene Sets      | Toll Like Receptor 9 (TLR9) Cascade                                                         | <i>IRAK2, MEF2C, RIPK2, IRAK4</i>                     | 109          | 0.03669725 | 0.004938264 |
| M276          | 9        | Canonical Pathways      | PID FGF PATHWAY                                                                             | <i>FGF1, FGF23, FGF19</i>                             | 55           | 0.05454546 | 0.0049666   |
| GO:0032496    | 14       | GO Biological Processes | response to lipopolysaccharide                                                              | <i>HCK, IRAK2, MEF2C, ADAMI7, RIPK2, IRAK3, IRAK4</i> | 332          | 0.02108434 | 0.00504794  |
| hsa04066      | 18       | KEGG Pathway            | HIF-1 signaling pathway                                                                     | <i>ANGPT1, ANGPT2, EGF, ANGPT4</i>                    | 110          | 0.03636364 | 0.005100029 |
| GO:0002752    | 14       | GO Biological Processes | cell surface pattern recognition receptor signaling pathway                                 | <i>IRAK2, RIPK2, IRAK4</i>                            | 56           | 0.05357143 | 0.005223883 |
| R-HSA-168643  | 14       | Reactome Gene Sets      | Nucleotide-binding domain, leucine rich repeat containing receptor (NLR) signaling pathways | <i>CASP2, IRAK2, RIPK2</i>                            | 56           | 0.05357143 | 0.005223883 |
| GO:0071216    | 14       | GO Biological Processes | cellular response to biotic stimulus                                                        | <i>HCK, IRAK2, MEF2C, RIPK2, IRAK3, IRAK4</i>         | 253          | 0.02371542 | 0.005302776 |

| Term         | Group ID | Category                | Description                                                          | Symbols                                               | Pathway size | Gene ratio | P value     |
|--------------|----------|-------------------------|----------------------------------------------------------------------|-------------------------------------------------------|--------------|------------|-------------|
| GO:0035265   | 10       | GO Biological Processes | organ growth                                                         | <i>COMP, MATN1, STK4, TGFBR3</i>                      | 112          | 0.03571429 | 0.005434137 |
| R-HSA-193648 | 19       | Reactome Gene Sets      | NRAGE signals death through JNK                                      | <i>BAD, NGF, MAGED1</i>                               | 57           | 0.05263158 | 0.005489051 |
| GO:0043549   | 7        | GO Biological Processes | regulation of kinase activity                                        | <i>ANGPT1, EREG, FGF1, GAS6, PDGFB, TRAF4</i>         | 256          | 0.0234375  | 0.00560932  |
| GO:0060350   | 10       | GO Biological Processes | endochondral bone morphogenesis                                      | <i>COMP, MATN1, MEF2C</i>                             | 60           | 0.05       | 0.006332494 |
| WP5180       | 11       | WikiPathways            | DYRK1A involvement regarding cell proliferation in brain development | <i>NCSTN, APH1A, PSENN</i>                            | 62           | 0.0483871  | 0.006935332 |
| GO:0050852   | 14       | GO Biological Processes | T cell receptor signaling pathway                                    | <i>MOG, RIPK2, SIVA1, TNFRSF21</i>                    | 121          | 0.03305785 | 0.007118648 |
| GO:0051785   | 13       | GO Biological Processes | positive regulation of nuclear division                              | <i>EGF, EREG, PDGFB</i>                               | 63           | 0.04761905 | 0.007249081 |
| R-HSA-450294 | 14       | Reactome Gene Sets      | MAP kinase activation                                                | <i>IRAK2, MEF2C, RIPK2</i>                            | 63           | 0.04761905 | 0.007249081 |
| GO:0002237   | 14       | GO Biological Processes | response to molecule of bacterial origin                             | <i>HCK, IRAK2, MEF2C, ADAMI7, RIPK2, IRAK3, IRAK4</i> | 357          | 0.01960784 | 0.007409881 |
| GO:0045089   | 14       | GO Biological Processes | positive regulation of innate immune response                        | <i>EREG, HCK, IRAK2, RIPK2, IRAK3, IRAK4, RTN4</i>    | 357          | 0.01960784 | 0.007409881 |
| hsa04062     | 20       | KEGG Pathway            | Chemokine signaling pathway                                          | <i>BAD, HCK, SHC2, SHC3, SHC4</i>                     | 193          | 0.02590674 | 0.007452371 |

| Term       | Group ID | Category                | Description                               | Symbols                    | Pathway size | Gene ratio | P value     |
|------------|----------|-------------------------|-------------------------------------------|----------------------------|--------------|------------|-------------|
| GO:0007249 | 14       | GO Biological Processes | canonical NF-kappaB signal transduction   | <i>IRAK2, TRADD, RIPK2</i> | 64           | 0.046875   | 0.00757112  |
| GO:0034109 | 17       | GO Biological Processes | homotypic cell-cell adhesion              | <i>CLIC1, COMP, ITGB3</i>  | 65           | 0.04615385 | 0.007901497 |
| M237       | 16       | Canonical Pathways      | PID VEGFR1 2 PATHWAY                      | <i>ITGAV, ITGB3, VTN</i>   | 69           | 0.04347826 | 0.009307325 |
| GO:1905953 | 16       | GO Biological Processes | negative regulation of lipid localization | <i>EGF, ITGAV, ITGB3</i>   | 70           | 0.04285714 | 0.009680077 |

Results aggregate GO, KEGG, Reactome, WikiPathways, and Canonical Pathways. Top categories include PID p75NTR, PI3K–Akt, neurotrophin signaling, nervous system development, and ECM proteoglycans; gene ratio and *P* value are reported per term.

**Abbreviations:** ECM, extracellular matrix; GO, Gene Ontology; KEGG, Kyoto Encyclopedia of Genes and Genomes; MAPK, mitogen-activated protein kinase; PID, Pathway Interaction Database; PI3K, phosphoinositide 3-kinase; p75NTR, p75 neurotrophin receptor; PPI, protein–protein interaction; TRK, tropomyosin receptor kinase
